# Supplementary material for: The AAA+ chaperone VCP disaggregates Tau fibrils and generates aggregate seeds in a cellular system
Source: Springer Nature journal article supplement (doi:10.1038/s41467-023-36058-2), 2023-02-02

## Supplementary Information

# The AAA+ chaperone VCP disaggregates Tau fibrils and generates aggregate seeds in a cellular system

Itika Saha<sup>1,2</sup>, Patricia Yuste-Checa<sup>1,2</sup>, Miguel Da Silva Padilha<sup>3,4,7</sup>, Qiang Guo<sup>5,#</sup>, Roman Körner<sup>1</sup>, Hauke Holthausen<sup>1</sup>, Victoria A. Trinkaus<sup>1,5,6</sup>, Irina Dudanova<sup>3,4,7</sup>, Rubén Fernández-Busnadiego<sup>2,5,8,9</sup>, Wolfgang Baumeister<sup>5</sup>, David W. Sanders<sup>10,‡</sup>, Saurabh Gautam<sup>1,§</sup>, Marc I. Diamond<sup>10</sup>, F. Ulrich Hartl<sup>1,2,6,\*</sup> and Mark S. Hipp<sup>1,6,11,12\*</sup>

<sup>1</sup>Department of Cellular Biochemistry, Max Planck Institute of Biochemistry, Am Klopferspitz 18, 82152 Martinsried, Germany.

<sup>2</sup>Aligning Science Across Parkinson's (ASAP) Collaborative Research Network, Chevy Chase, MD, USA.

<sup>3</sup>Molecular Neurodegeneration Group, Max Planck Institute for Biological Intelligence, 82152 Martinsried, Germany.

<sup>4</sup>Department of Molecules – Signaling – Development, Max Planck Institute for Biological Intelligence, Am Klopferspitz 18, 82152 Martinsried, Germany.

<sup>5</sup>Department of Structural Molecular Biology, Max Planck Institute of Biochemistry, Am Klopferspitz 18, 82152 Martinsried, Germany.

<sup>6</sup>Munich Cluster for Systems Neurology (SyNergy), Munich, Germany.

<sup>7</sup>Center for Anatomy, Faculty of Medicine and University Hospital Cologne, University of Cologne, 50931 Cologne, Germany.

<sup>8</sup>Institute of Neuropathology, University Medical Center Göttingen, 37099 Göttingen, Germany.

<sup>9</sup>Cluster of Excellence "Multiscale Bioimaging: from Molecular Machines to Networks of Excitable Cells" (MBExC), University of Göttingen, Germany.

<sup>10</sup>Center for Alzheimer's and Neurodegenerative Diseases, Peter O'Donnell Jr. Brain Institute, University of Texas Southwestern Medical Center, Dallas, 75390 Texas, USA.

<sup>11</sup>School of Medicine and Health Sciences, Carl von Ossietzky University Oldenburg, Oldenburg, Germany.

<sup>12</sup>Department of Biomedical Sciences of Cells and Systems, University Medical Center Groningen, University of Groningen, Antonius Deusinglaan, 1, 9713 AV Groningen, The Netherlands.

# Present address: State Key Laboratory of Protein and Plant Gene Research, School of Life Sciences and Peking-Tsinghua Center for Life Sciences, Peking University, Beijing 100871, China.

‡ Present address: Department of Chemical and Biological Engineering, Princeton University, Princeton, NJ 08544, USA

§ Present address: Boehringer Ingelheim International GmbH, 55216 Ingelheim, Germany and ViraTherapeutics GmbH, 6063 Rum, Austria.

\*Correspondence to [uhartl@biochem.mpg.de](mailto:uhartl@biochem.mpg.de) and [m.s.hipp@umcg.nl](mailto:m.s.hipp@umcg.nl)

Supplementary information includes 13 Supplementary Figures, Supplementary Table 1 and uncropped scans of blots presented in supplementary figures.

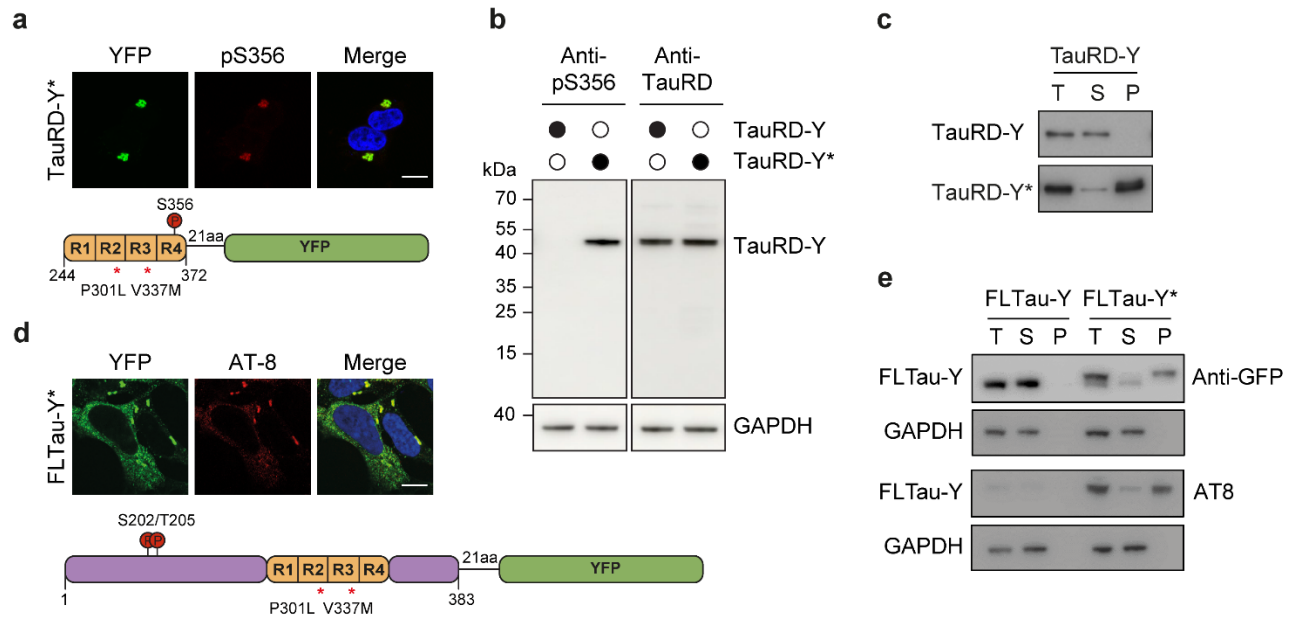

**Supplementary Fig. 1: Tau aggregation in a constitutive expression model.**

**a** Immunofluorescence staining of TauRD-Y\* cells with an antibody against Tau phosphorylation at S356 (red) and YFP fluorescence of TauRD-Y (green). Scale bar, 10  $\mu$ m. **b** Analysis of Tau S356 phosphorylation in lysates of TauRD-Y and TauRD-Y\* cells by immunoblotting. Total TauRD-Y was detected using antibody against TauRD. **c** Solubility of TauRD-Y in TauRD-Y and TauRD-Y\* cells at steady state, determined by fractionation of cell lysate by centrifugation, followed by immunoblotting with anti-GFP antibody. T, total cell lysate, S, supernatant, P, pellet. **d** Immunofluorescence staining of full-length Tau (FLTau-Y) in aggregate-containing FLTau-Y\* cells with AT-8 antibody specific for Tau phosphorylation at S202/T205 (red) and YFP fluorescence of TauRD-Y (green). Scale bar, 10  $\mu$ m. **e** Solubility of phosphorylated FLTau-Y in FLTau-Y and FLTau-Y\* cells at steady state analyzed as in (c). Immunoblotting was with AT-8 antibody (bottom) and anti-GFP (top). GAPDH served as loading control.

**a**

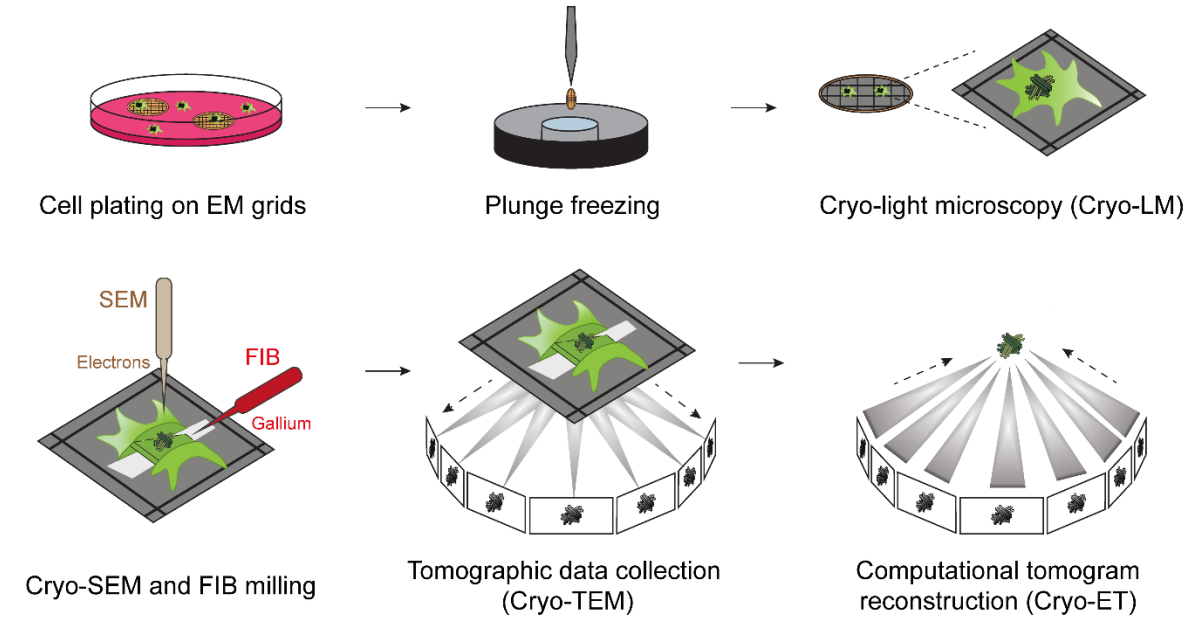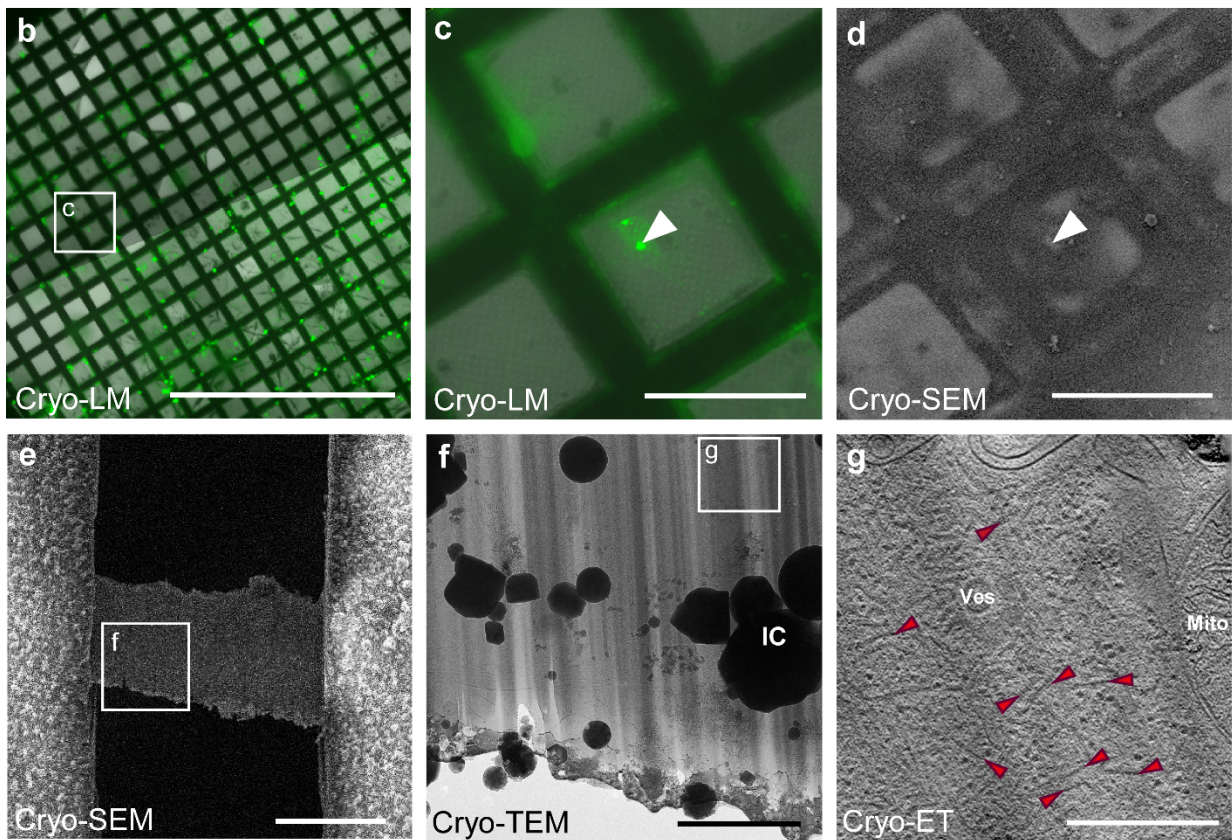

## Supplementary Fig. 2: Cryo-correlative-light-electron microscopy (cryo-CLEM) workflow.

**a** Schematic representation of the cryo-CLEM workflow on cells containing TauRD-Y aggregates.

Cryo-LM (cryo-light microscopy), cryo-SEM (cryo-scanning electron microscopy), cryo-FIB



64 (focused ion beam), cryo-TEM (cryo-transmission electron microscopy), cryo-ET (cryo-electron  
65 tomography). **b** Mouse primary neurons were cultured on EM grids for 10 days and transduced  
66 with TauRD-Y followed by treatment with aggregate-containing cell lysates. 6 days after  
67 transduction, grids were vitrified by plunge freezing. Thereafter, grids were imaged by cryo-light  
68 microscopy (cryo-LM). An image of a grid with neurons containing aggregates is shown. Scale  
69 bar, 1 mm. **c** Zoomed in cryo-LM image of the area marked in (b) by a white box. The arrowhead  
70 indicates a neuronal TauRD-Y inclusion. Scale bar, 100  $\mu$ m. **d** EM grids were transferred into the  
71 cryo-FIB/SEM. Cryo-SEM image of the area shown in (c). The arrowhead indicates the same  
72 location of the area shown in (c). Scale bar, 100  $\mu$ m. **e** A ~200 nm thick lamella was generated at  
73 that location by cryo-FIB milling. Scale bar, 10  $\mu$ m. **f** Cryo-TEM overview of the lamella region  
74 marked in (e). IC: Ice crystal. Scale bar, 2  $\mu$ m. **g** 1.4 nm thick tomographic slice of a neuronal  
75 TauRD-Y inclusion recorded in the area marked in (f). Red arrowheads indicate representative  
76 TauRD-Y fibrils. Ves: Vesicle, Mito: Mitochondrion. Scale bar, 500 nm.

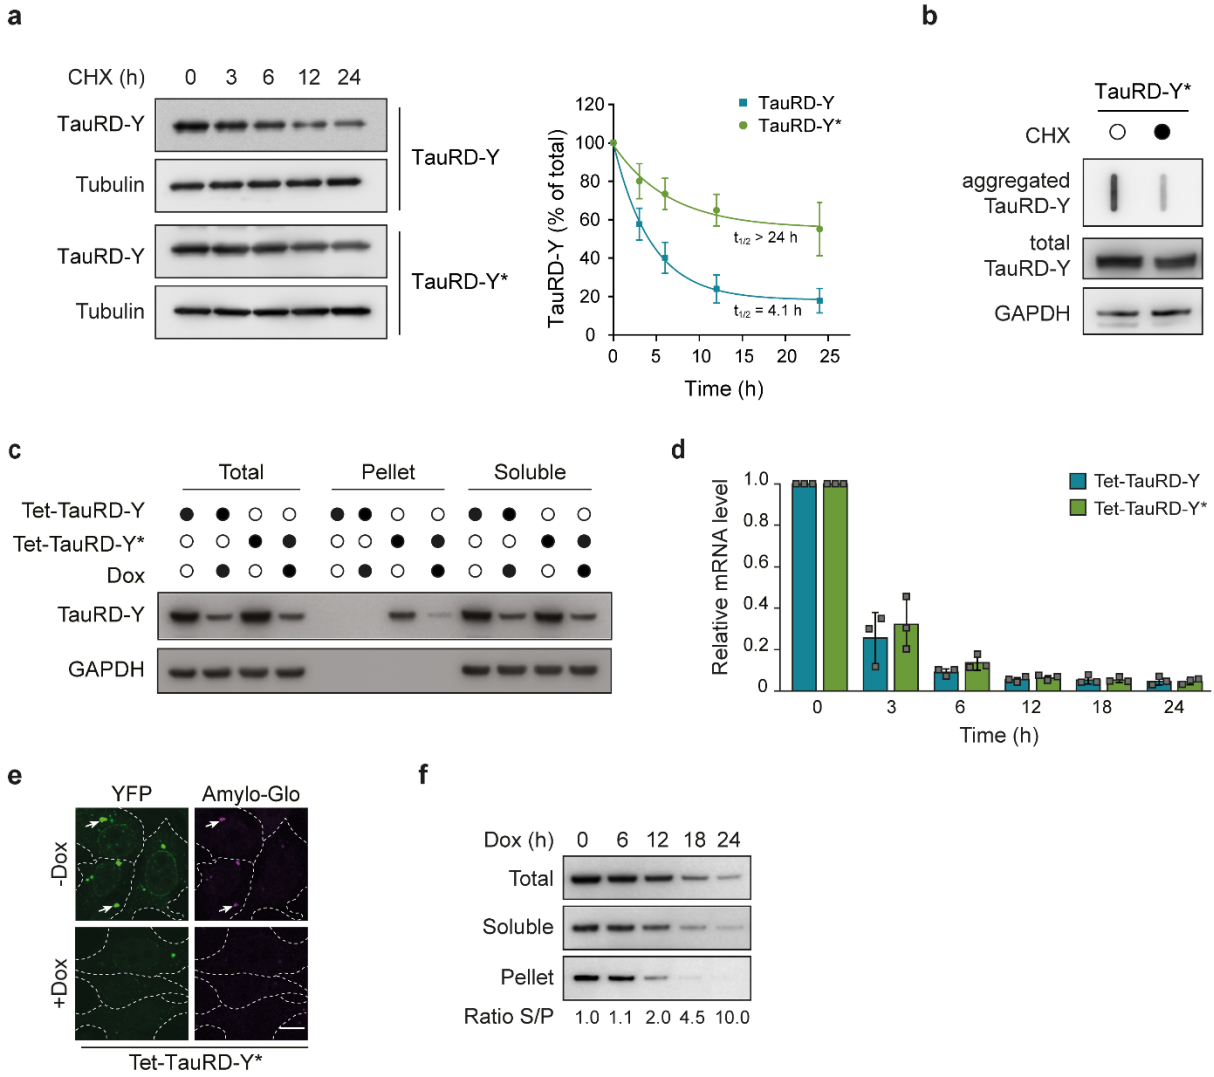

**Supplementary Fig. 3: TauRD-Y aggregation and clearance upon inhibition of expression in a constitutive and Tet-regulated TauRD-Y expression system.**

**a** Turnover of TauRD-Y in TauRD-Y and TauRD-Y\* cells upon cycloheximide (CHX) shut-off (CHX; 50  $\mu$ g/mL). Left, anti-GFP immunoblots to determine TauRD-Y levels. Tubulin served as loading control. Right, exponential fits of CHX chase data and corresponding half-lives ( $t_{1/2}$ ). Mean  $\pm$  s.d.; n=3. **b** Filter trap analysis of aggregated TauRD-Y upon CHX chase for 24 h. Aggregated and total TauRD-Y levels were determined by anti-GFP immunoblotting. GAPDH served as loading control. **c** Solubility of TauRD-Y in Tet-TauRD-Y and Tet-TauRD-Y\* cells upon addition of 50 ng/mL doxycycline (Dox) for 24 h. Cell lysates were fractionated as in

Supplementary Fig. 1c. TauRD-Y was detected with anti-GFP antibody. GAPDH served as loading control. **d** Quantitative PCR analysis of TauRD-Y mRNA in Tet-TauRD-Y and Tet-TauRD-Y\* cells treated with Dox for 0, 3, 6, 12, 18 and 24 h. mRNA levels were normalized to the reference gene *RPS18*. Mean  $\pm$  s.d.; n=3. **e** Representative fluorescence images of Tet-TauRD-Y\* cells treated with Dox for 24 h showing staining of TauRD-Y inclusions (green) with Amylo-Glo (magenta). White dashed lines indicate cell boundaries. Scale bar, 10  $\mu$ m. **f** Solubility of TauRD-Y in Tet-TauRD-Y\* cells upon addition of Dox for the indicated times. Normalized ratios of TauRD-Y in soluble (S) and pellet (P) fractions are stated. Source data are provided as a Source Data file.

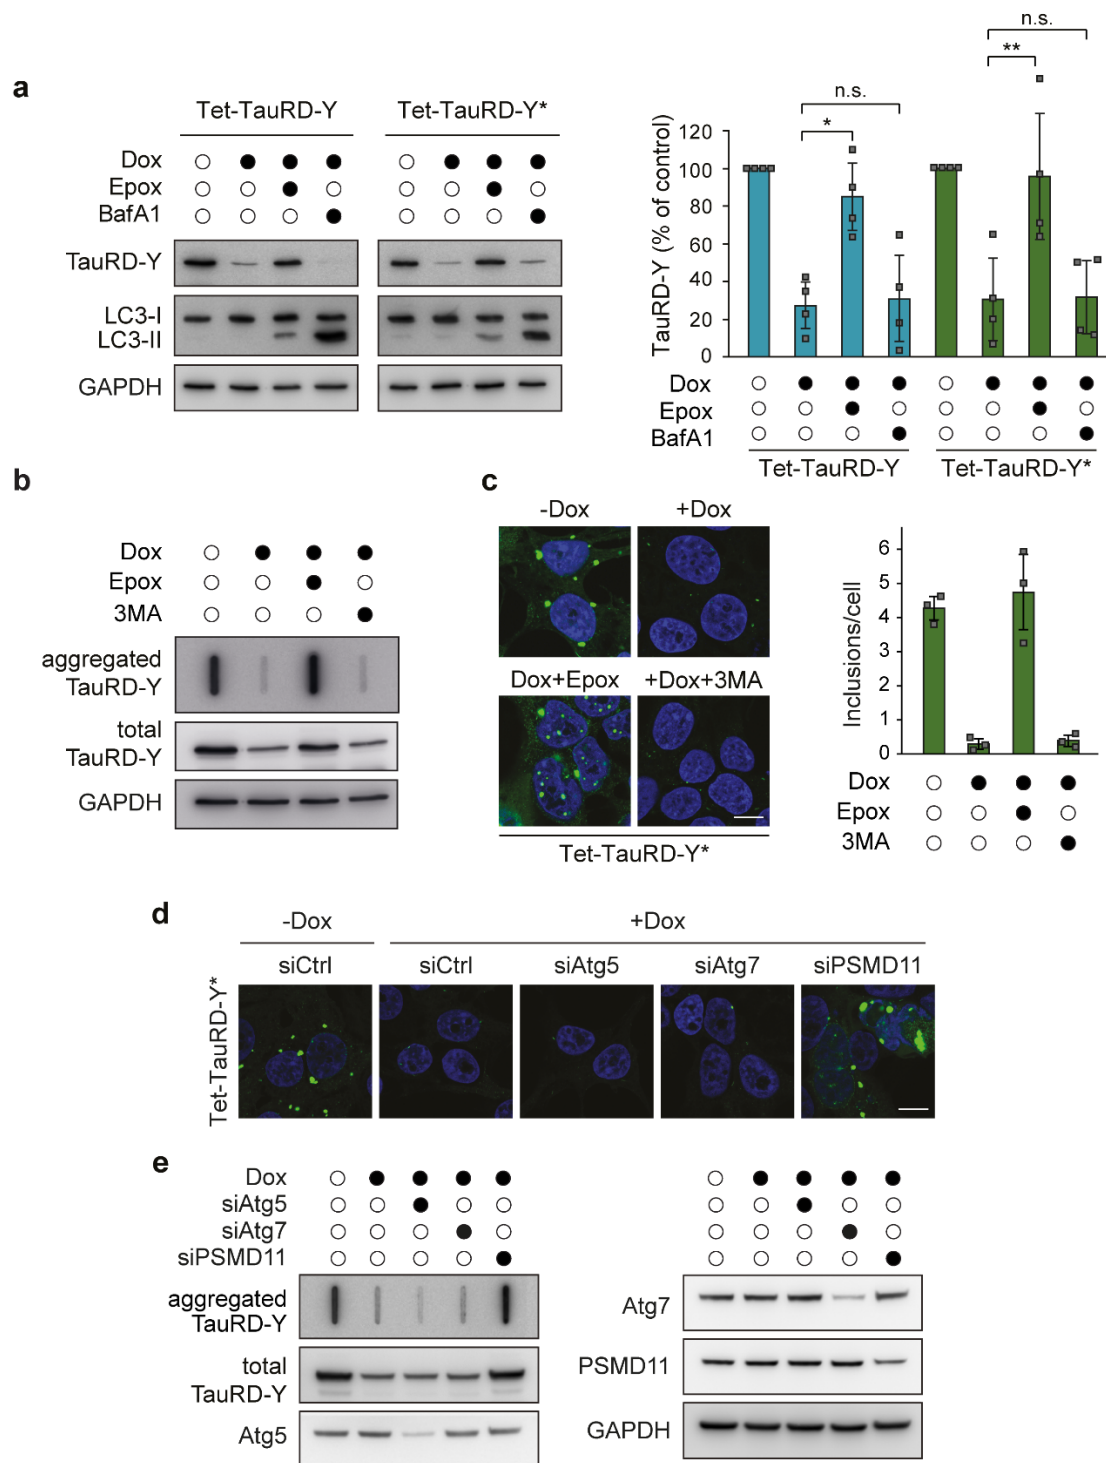

**Supplementary Fig. 4: Effect of UPS and autophagy inhibition on TauRD-Y levels and aggregate clearance.**

**a** Analysis of TauRD-Y levels in Tet-TauRD-Y and Tet-TauRD-Y\* cells treated for 24 h with doxycycline (Dox; 50 ng/mL) alone or in combination with Epoxomicin (Epox; 50 nM) or

102 Bafilomycin A1 (BafA1; 50 nM). TauRD-Y and LC3 levels were determined by immunoblotting  
 103 against GFP and LC3B respectively. GAPDH served as loading control. Mean  $\pm$  s.d.; n=4. \*p<0.05  
 104 (Tet-TauRD-Y: + Dox vs + Dox + Epox, p=0.0114), \*\*p<0.01 (Tet-TauRD-Y\*: + Dox vs + Dox  
 105 + Epox, p=0.0026); n.s. non-significant (Tet-TauRD-Y: + Dox vs + Dox + Epox, p= 0.6422; Tet-  
 106 TauRD-Y\*: + Dox vs + Dox + Epox, p= 0.8799) from two-tailed Student's paired t-test. **b** Filter  
 107 trap analysis of Tet-TauRD-Y\* cells treated for 24 h with Dox alone or in combination with  
 108 Epoxomicin (Epox; 50 nM) or 3-methyladenine (3MA; 5 mM). Aggregated and total TauRD-Y  
 109 was detected with anti-GFP antibody. **c** Left, representative images of Tet-TauRD-Y\* cells treated  
 110 for 24 h with Dox alone or, in combination with Epoxomicin (Epox; 50 nM) or 3MA (5 mM).  
 111 Scale bar, 10  $\mu$ m. Right, quantification of TauRD-Y foci. 100-200 cells analyzed per experiment.  
 112 Mean  $\pm$  s.d.; n=3. **d** Representative images of Tet-TauRD-Y\* cells transfected with non-targeted  
 113 (Ctrl) siRNA or siRNA against Atg5 (50 nM), Atg7 (50 nM) and PSMD11 (25 nM). 72 h after  
 114 transfection, doxycycline (Dox; 50 ng/mL) was added for another 24 h where indicated. Scale bar,  
 115 10  $\mu$ m. **e** Filter trap analysis of Tet-TauRD-Y\* cells transfected with siRNAs and treated with Dox  
 116 as stated in (d). TauRD-Y was detected by immunoblotting with anti-GFP antibody. Source data  
 117 are provided as a Source Data file.



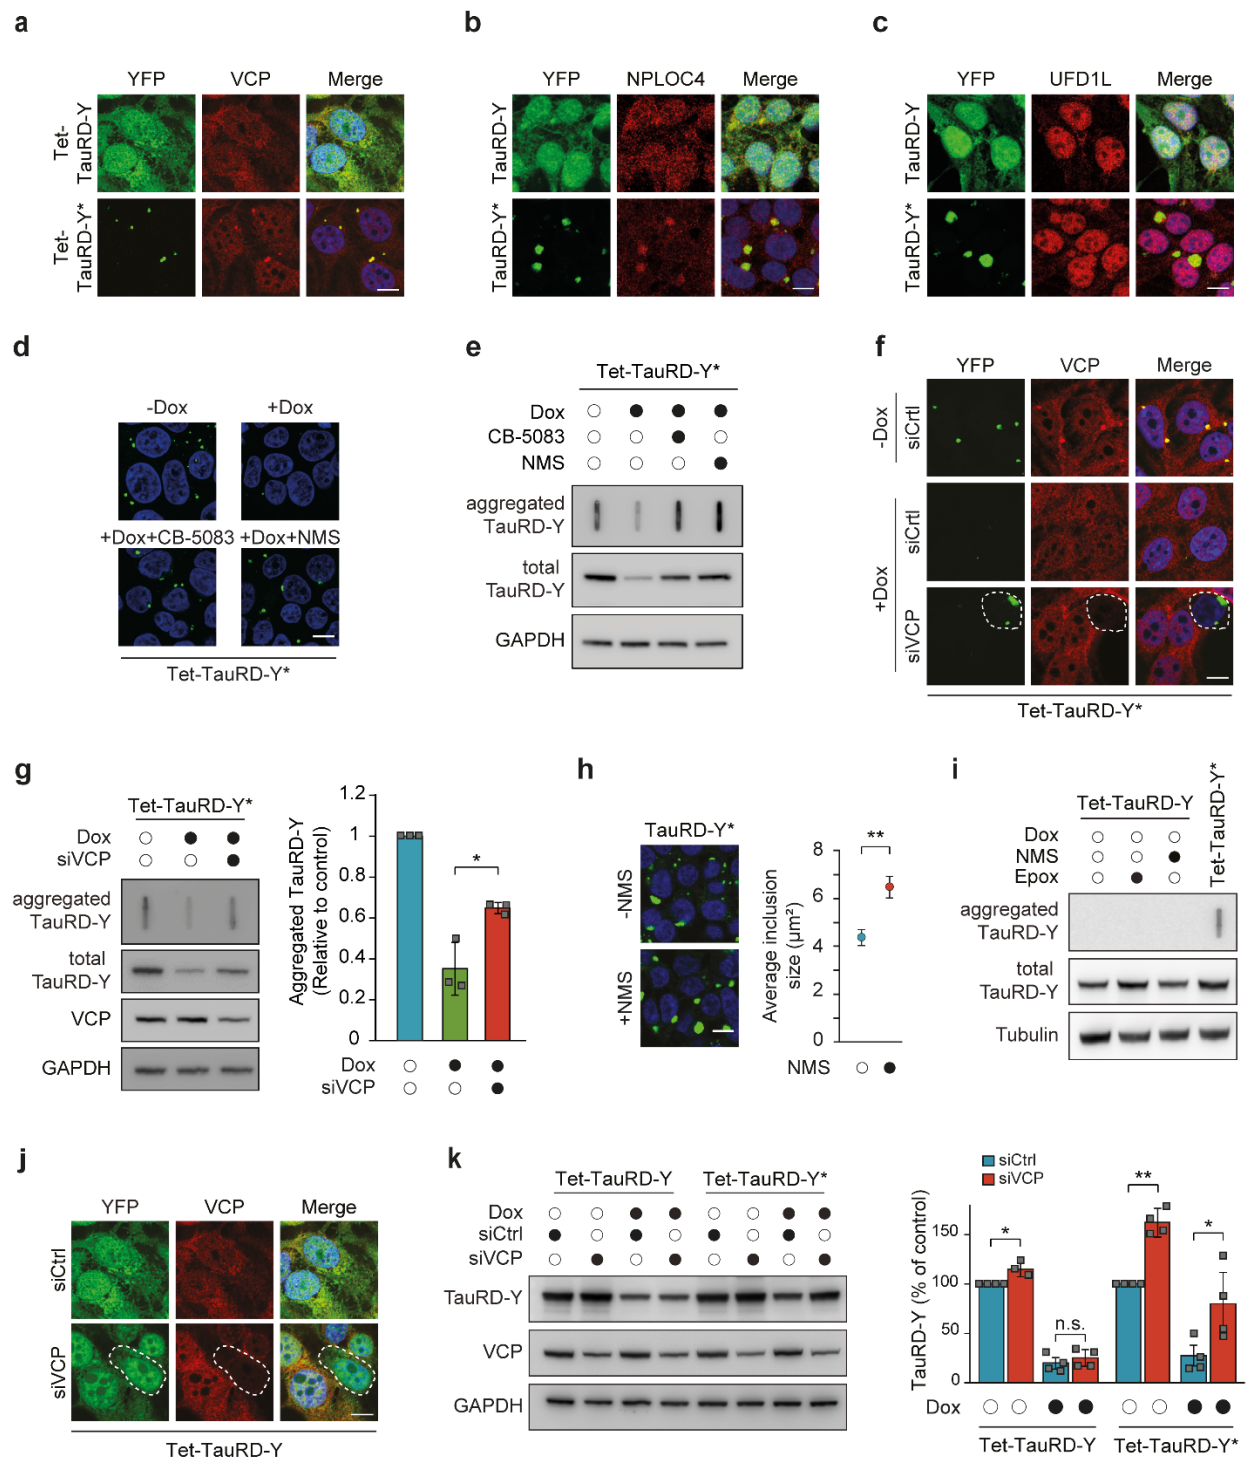

**Supplementary Fig. 5: Aggregation specific stabilization of Tau by VCP inactivation.**

**a** Immunofluorescence staining of VCP (red) and YFP fluorescence of TauRD-Y (green). **b** and **c** Immunofluorescence staining of NPLOC4 (**b**) (red) and UFD1L (**c**) (red). Scale bars, 10  $\mu$ m. **d** Representative images of Tet-TauRD-Y\* cells treated with doxycycline (Dox; 50 ng/mL) alone

123 or in combination with CB-5083 (1  $\mu$ M) or NMS-873 (NMS; 2.5  $\mu$ M). Scale bar, 10  $\mu$ m. **e** Filter  
 124 trap analysis of Tet-TauRD-Y\* cells treated as in (d). **f** Immunofluorescence staining of VCP (red)  
 125 in Tet-TauRD-Y\* cells treated with non-targeted (Ctrl) or VCP siRNA for 96 h. Doxycycline  
 126 (Dox; 50 ng/mL) was added for the last 24 h. Dashed lines indicate a cell with reduced VCP levels.  
 127 Scale bar, 10  $\mu$ m. **g** Left, filter trap analysis of aggregated TauRD-Y in Tet-TauRD-Y\* lysates  
 128 treated as in (f). Right, quantification of aggregated TauRD-Y. Mean  $\pm$  s.d.; n=3. \*p<0.05 (p=  
 129 0.0174) from two-tailed Student's paired t-test. **h** Representative images of TauRD-Y\* cells  
 130 treated with NMS-873 (NMS; 5  $\mu$ M) and quantification of average inclusion size ( $\mu$ m<sup>2</sup>). 200-400  
 131 cells analyzed per experiment. Mean  $\pm$  s.d.; n=5. \*\*p<0.01 (p= 0.0022) from two-tailed Student's  
 132 paired t-test. **i** Filter trap analysis of Tet-TauRD-Y cells treated with Epoxomicin (Epox; 50 nM)  
 133 or NMS-873 (NMS; 2.5  $\mu$ M). Tet-TauRD-Y\* lysate was used as control. **j** Immunofluorescence  
 134 staining of VCP (red) and YFP fluorescence of TauRD-Y (green) in Tet-TauRD-Y cells  
 135 transfected with non-targeted (Ctrl) or VCP siRNA. Dashed lines indicate a cell with reduced VCP  
 136 levels. Scale bar, 10  $\mu$ m. **k** Left, analysis of TauRD-Y level in Tet-TauRD-Y and Tet-TauRD-Y\*  
 137 cells transfected for 96 h with non-targeted (Ctrl) or VCP siRNA. Doxycycline (Dox; 50 ng/mL)  
 138 was added for the last 24 h. TauRD-Y was detected with anti-TauRD antibody. Right,  
 139 quantification of TauRD-Y immunoblot. Mean  $\pm$  s.d.; n=4. \*p<0.05 (Tet-TauRD-Y - Dox: siCtrl  
 140 vs siVCP, p= 0.0218; Tet-TauRD-Y\* + Dox: siCtrl vs siVCP, p= 0.0156); \*\*p<0.01 (Tet-TauRD-  
 141 Y\* - Dox: siCtrl vs siVCP, p= 0.0023); n.s. non-significant (Tet-TauRD-Y + Dox: siCtrl vs siVCP,  
 142 p= 0.0539) from two-tailed paired Student's t-test. Source data are provided as a Source Data file.

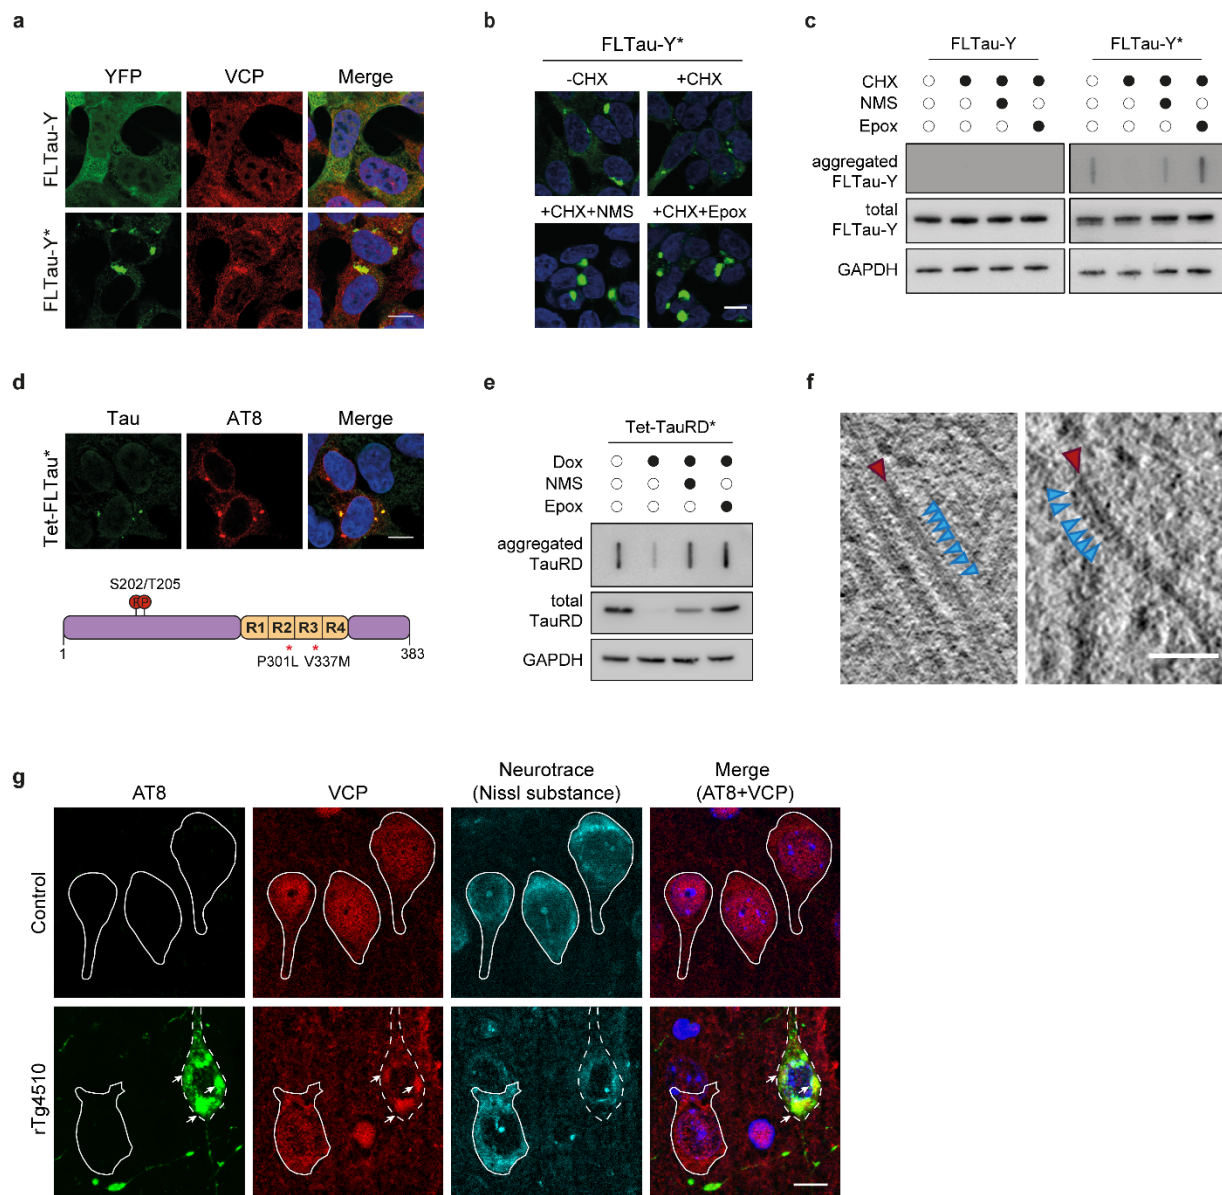

## Supplementary Fig. 6: Role of VCP in full length Tau disaggregation.

**a** Immunofluorescence staining of VCP (red) and YFP fluorescence of FLTau-Y (green) in FLTau-Y and FLTau-Y\* cells. Scale bar, 10  $\mu$ m. **b** Representative images of FLTau-Y\* cells treated for 24 h with cycloheximide (CHX; 50  $\mu$ g/mL) alone or in combination with NMS-873 (NMS; 2.5  $\mu$ M) or Epoxomicin (Epox; 100 nM). Scale bar, 10  $\mu$ m. **c** Filter trap analysis of lysates from FLTau-Y and FLTau-Y\* cells treated for 24 h with Dox alone or in combination with NMS-873 (NMS; 2.5  $\mu$ M) or Epoxomicin (Epox; 50 nM). Aggregated and total FLTau-Y levels were

determined by immunoblotting against GFP. GAPDH served as loading control.

**d** Immunofluorescence staining of full-length Tau (FLTau) in aggregate-containing Tet-FLTau\* cells with Tau (green) and Tau S202/T205 phosphorylation specific AT-8 (red) antibody. Scale bar, 10  $\mu$ m.

**e** Filter trap analysis of lysates from Tet-TauRD\* cells treated for 24 h with Dox alone or in combination with NMS-873 (NMS; 2.5  $\mu$ M) or Epoxomicin (Epox; 50 nM). Aggregated and total TauRD levels were determined by immunoblotting against myc and TauRD, respectively. GAPDH served as loading control.

**f** Examples of two TauRD-Y fibrils from a representative 1.4 nm thick tomographic slice of a TauRD inclusion from neurons. Red arrowheads indicate TauRD-Y fibrils and blue arrowheads indicate globular densities along fibrils. Scale bar, 40 nm.

**g** Immunofluorescence staining of brain sections of 4-month-old control and Tau transgenic rTg4510 mice with AT8 (green) and VCP (red) antibodies, Nissl substance (cyan) and DAPI (blue in the merged image). The outline of a cell containing phosphorylated Tau (p-Tau) is marked by a white dashed line. Cells not containing detectable p-Tau are marked by white continuous lines. Arrows point to VCP colocalizing with Tau inclusions. Scale bar, 10  $\mu$ m.

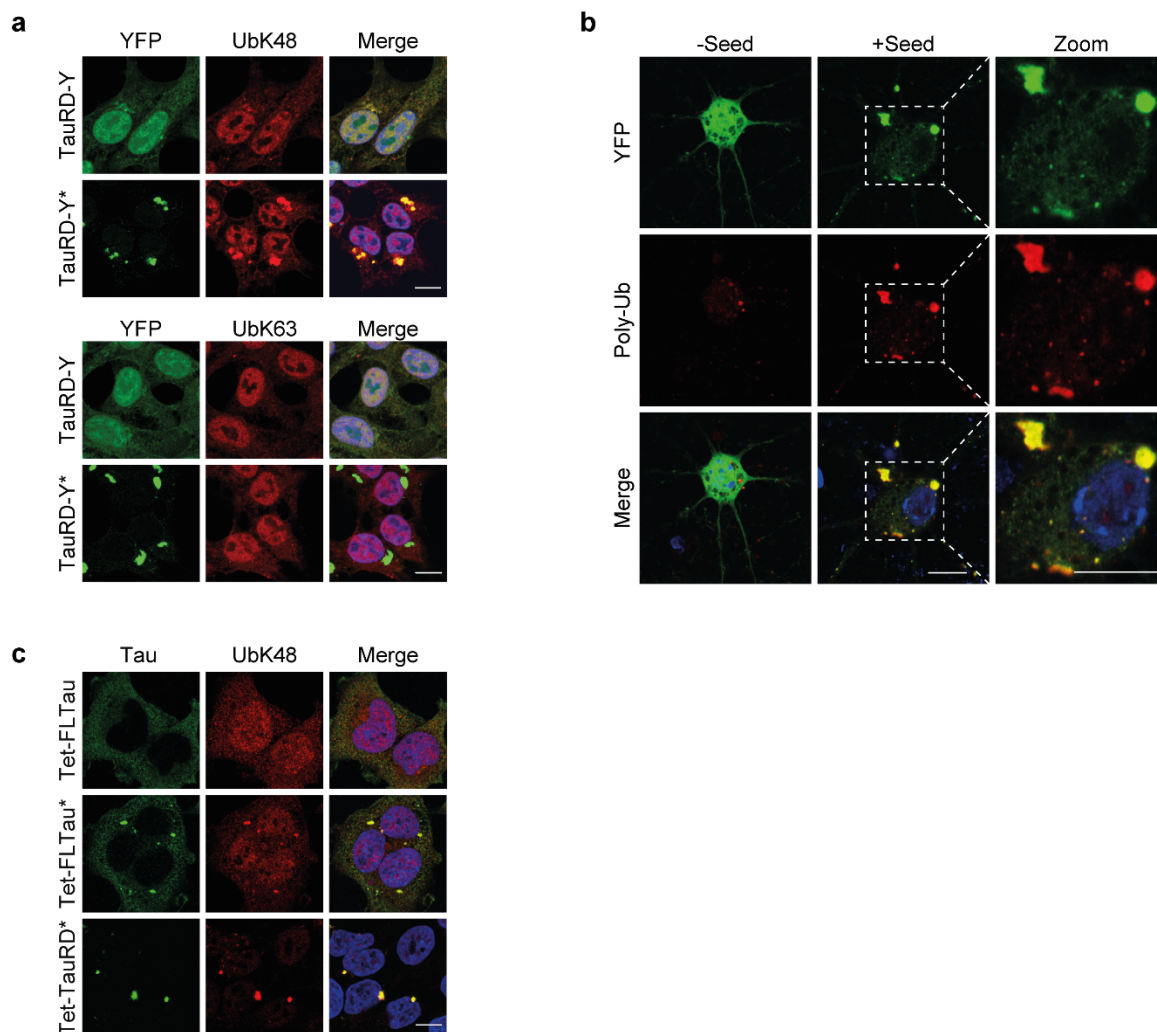

# **Supplementary Fig. 7: Ubiquitylation of TauRD-Y aggregates.**

**a** Immunofluorescence staining of (top) ubiquitin-K48 (UbK48) (red) and (bottom) ubiquitin K63 (UbK63) (red) chains and YFP fluorescence of TauRD-Y (green) in TauRD-Y and TauRD-Y\* cells. Scale bars, 10  $\mu$ m. **b** Immunofluorescence staining of ubiquitylated proteins (FK2 antibody) (red) in primary neurons expressing TauRD-Y (green) and treated with TauRD containing lysates (+Seed) where indicated. Scale bars, 20  $\mu$ m. **c** Immunofluorescence staining of ubiquitin-K48 (UbK48) (red) chains and Tau (green) in Tet-FLTau, Tet-FLTau\* and Tet-TauRD\* cells. FLTau was detected using Tau-5 and TauRD using anti-myc antibody. Scale bar, 10  $\mu$ m.



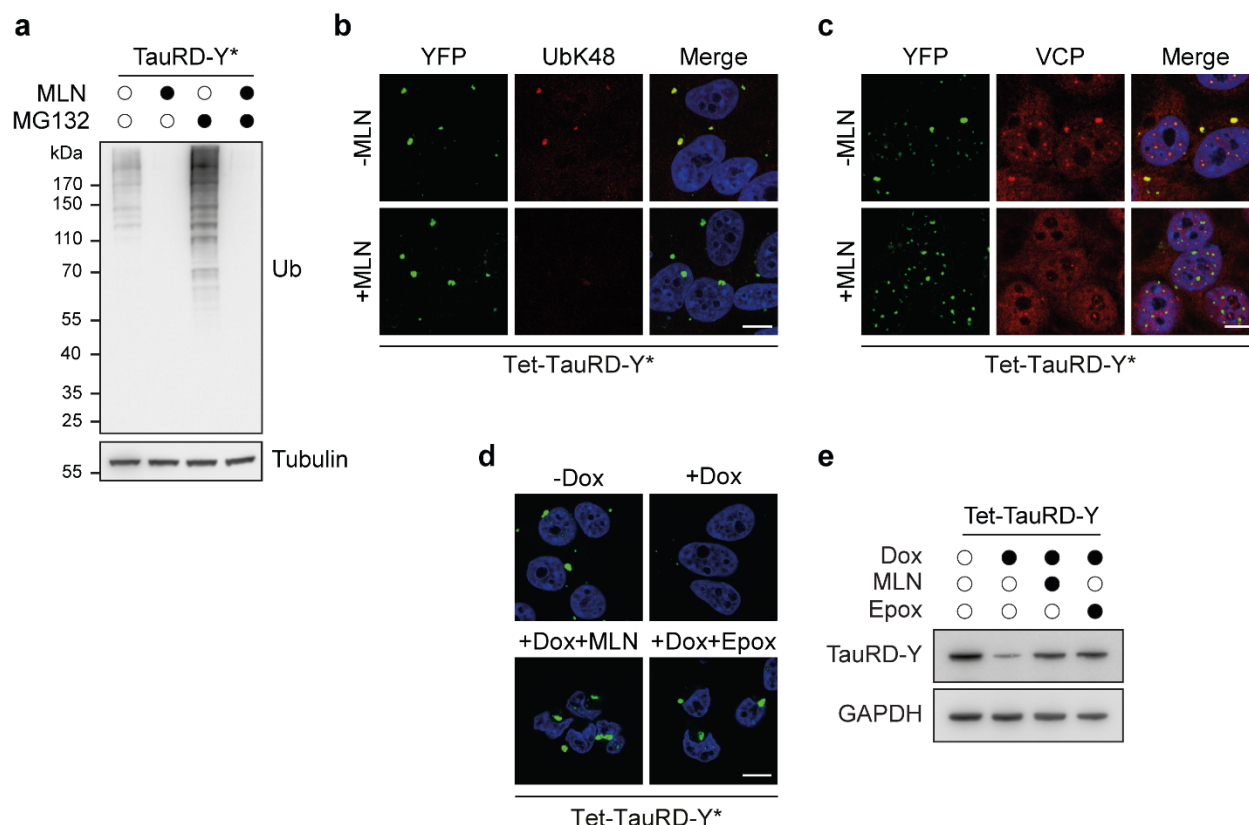

# **Supplementary Fig. 8: Role of ubiquitylation in TauRD-Y disaggregation.**

**a** Analysis of ubiquitylated protein levels in lysates of TauRD-Y\* cells treated with the ubiquitin activating enzyme E1 inhibitor MLN7243 (MLN; 0.5  $\mu$ M) alone or in combination with proteasome inhibitor MG132 (1  $\mu$ M) for 14 h. Ubiquitylated proteins were detected by immunoblotting against ubiquitin. Tubulin served as loading control. **b** Immunofluorescence staining of ubiquitin-K48 chains (UbK48) (red) and **c** VCP (red) in Tet-TauRD-Y\* cells treated with MLN7243 (MLN; 0.5  $\mu$ M) for 12 h. Scale bars, 10  $\mu$ m. **d** Representative images of Tet-TauRD-Y\* cells treated for 24 h with doxycycline (Dox; 50 ng/mL) alone or in combination with MLN7243 (MLN; 0.5  $\mu$ M) or Epoxomicin (Epox; 50 nM). Scale bar, 10  $\mu$ m. **e** Analysis of TauRD-Y levels in Tet-TauRD-Y cells treated for 24 h with Dox, MLN7243 and Epoxomicin as in (d). GAPDH served as loading control.

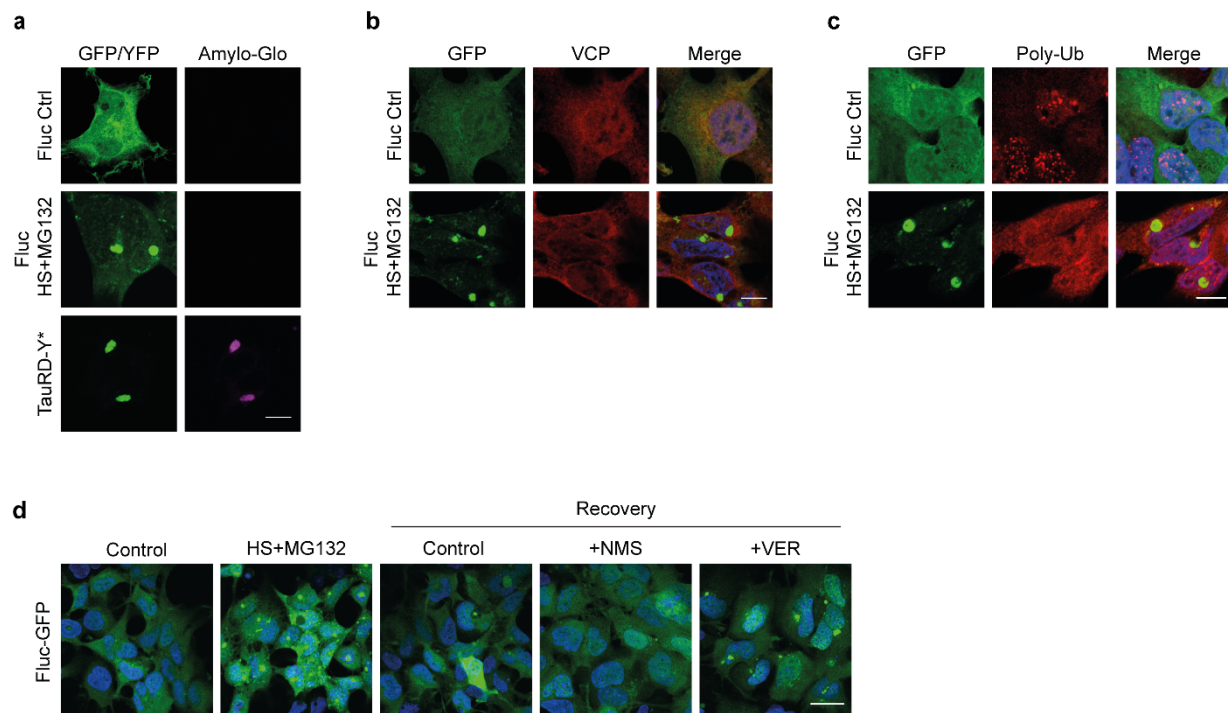

# **Supplementary Fig. 9: Effect of VCP inhibition on firefly luciferase (Fluc) disaggregation.**

**a** Fluc-GFP expressing cells maintained at 37 °C (Fluc Ctrl) or heat-stressed at 43 °C in presence of 5 μM MG132 for 2 h (Fluc HS) were stained with the amyloid-specific dye Amylo-Glo (magenta). TauRD-Y\* cells were used as control. Amylo-Glo fluorescence was imaged with similar exposure settings in all panels. Scale bar, 10 μm. **b** Immunofluorescence staining of VCP (red), and **c** ubiquitylated proteins (FK2 antibody) (red) in Fluc-GFP cells treated as in (a). Scale bars, 10 μm. **d** Effect of VCP and Hsp70 inhibition on Fluc-GFP disaggregation. Fluc-GFP aggregation was induced as in (a). Cells were then shifted to MG132 free media and allowed to recover at 37 °C for 8 h in presence of NMS-873 (NMS; 2.5 μM) and VER-155008 (VER; 10 μM) where indicated. Scale bar, 30 μm.

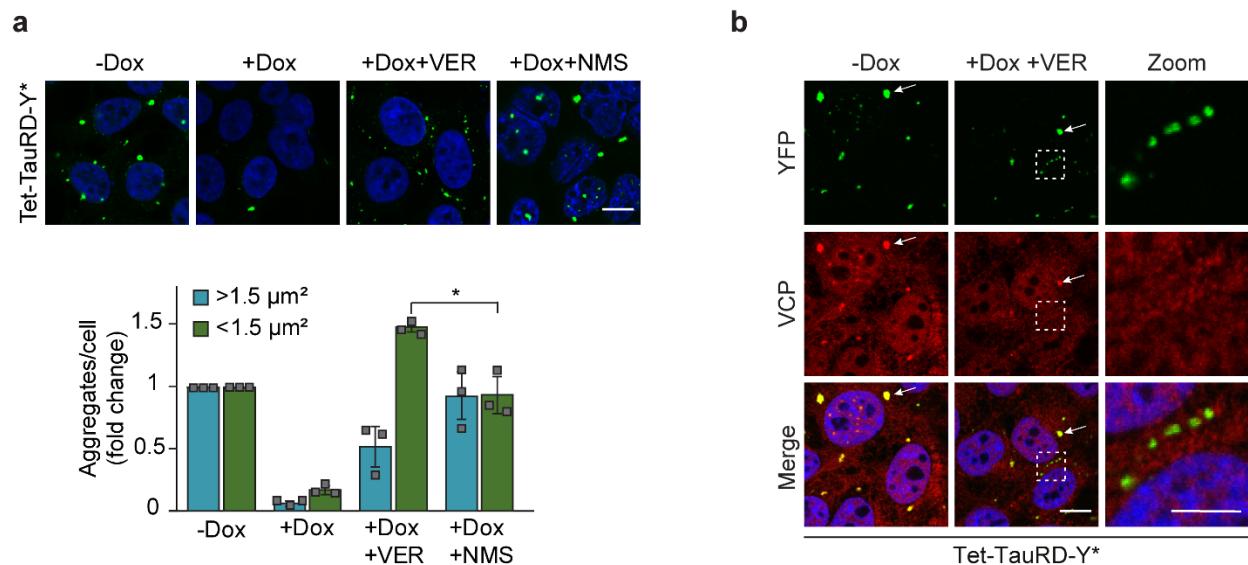

# **Supplementary Fig. 10: Role of Hsp70 in TauRD-Y disaggregation.**

**a** Top, Representative images of Tet-TauRD-Y\* cells treated for 24 h with doxycycline (Dox; 50 ng/mL) alone or in combination with VER-155008 (VER; 10  $\mu\text{M}$ ) or NMS-873 (NMS; 2.5  $\mu\text{M}$ ). Bottom, quantification of large (>1.5  $\mu\text{m}^2$ ) and small (<1.5  $\mu\text{m}^2$ ) TauRD-Y foci. Mean  $\pm$  s.d.; n=3; ~100-200 cells were analyzed per experiment. \*p<0.05 (p=0.0435) from two-tailed Student's paired t-test. Scale bar, 10  $\mu\text{m}$ . **b** Immunofluorescence staining of VCP (red) and YFP fluorescence of TauRD-Y (green) in Tet-TauRD-Y\* cells treated with a combination of doxycycline (Dox) and VER-155008 (VER) where indicated. White arrow points to large TauRD-Y inclusions co-localizing with VCP. Dashed lines enclose TauRD-Y foci that do not co-localize with VCP. Scale bar, 10  $\mu\text{m}$ . Scale bar zoom, 5  $\mu\text{m}$ . Source data are provided as a Source Data file.

212

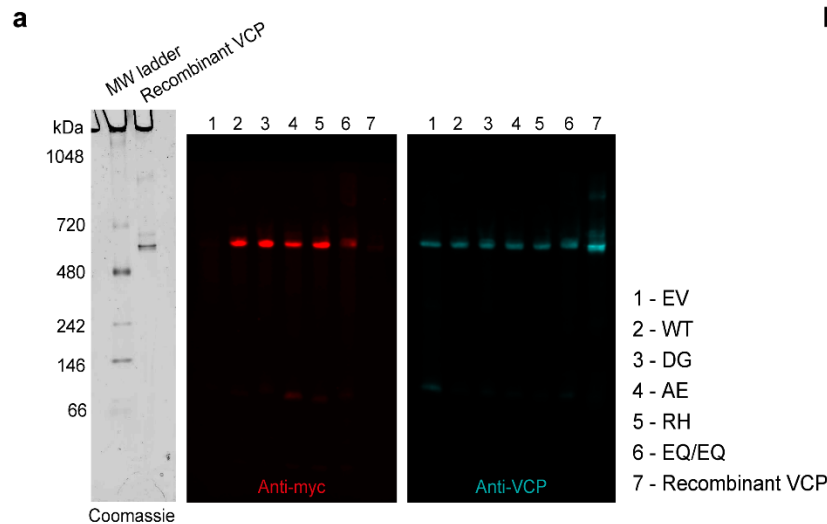

213

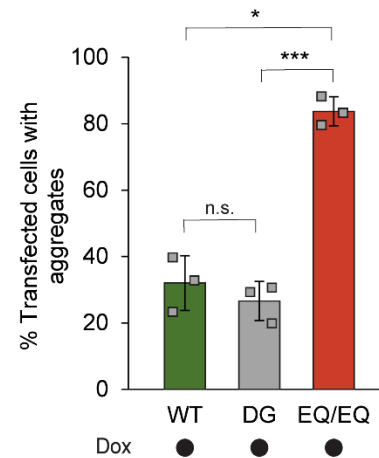

## Supplementary Fig. 11: Effect of VCP mutants on Tau disaggregation.

**a** Native-PAGE analysis of recombinant VCP and lysates from Tet-TauRD-Y\* cells transfected with empty vector (EV) and myc-tagged wild type (WT), D395G (DG), A232E (AE), R155H (RH) and E305Q/E578Q (EQ/EQ) VCP constructs. Immunoblot probed against myc (red) and VCP (cyan) is shown. Non-tagged, recombinant VCP was analyzed as control. **b** Quantification of aggregate foci in myc-positive Tet-TauRD-Y\* cells transfected with myc-tagged WT, DG and EQ/EQ VCP constructs for 24 h, and treated for another 24 h with doxycycline (Dox; 50 ng/mL). Mean  $\pm$  s.d.; n=3; > 100 cells analyzed per experiment; \*p<0.05 (WT vs EQ/EQ p=0.0192); \*\*\*p<0.001 (DG vs EQ/EQ p=0.0008); n.s. non-significant (p=0.5646). Source data are provided as a Source Data file.

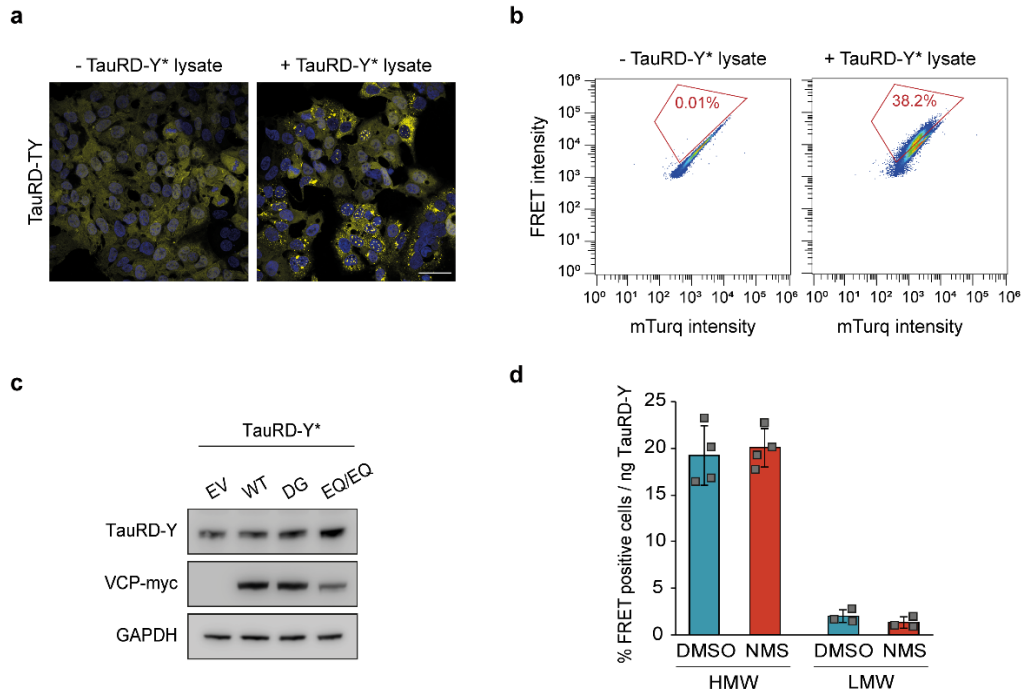

## Supplementary Fig. 12: Analysis of seeding-competent TauRD-Y.

**a** Representative images of TauRD-TY FRET reporter cells treated with TauRD-Y\* lysate where indicated showing TauRD-Y fluorescence in yellow. Scale bar, 40  $\mu$ m. **b** Representative pseudocolour dot plots for the analysis of FRET positive TauRD-TY cells by flow cytometry upon addition of TauRD-Y\* lysate. FRET intensity is plotted against mTurquoise2 (mTurq) intensity and the % of FRET positive cells are indicated in red gates. **c** Analysis of TauRD-Y and VCP-myc levels in TauRD-Y\* cells transfected for two days with empty vector (EV) and myc-tagged wild type (WT), D395G (DG) and E305Q/E578Q (EQ/EQ) VCP constructs. TauRD-Y and overexpressed VCP levels were determined by immunoblotting against GFP and myc, respectively. GAPDH served as loading control. **d** Comparison of seeding efficiencies of high molecular weight (HMW) and low molecular weight (LMW) species obtained by size exclusion chromatography of lysates from TauRD-Y\* cells treated for 24 h with DMSO or NMS-873 (NMS; 2  $\mu$ M). Mean  $\pm$  s.d.; HMW n=4, LMW n=3. Source data are provided as a Source Data file.



## 1. Selection of cells

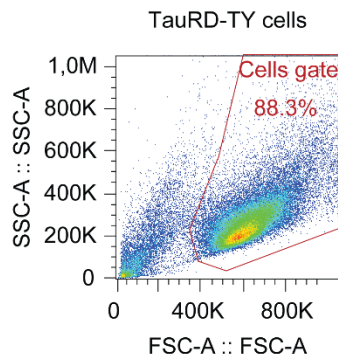

## 2. Selection of single cells

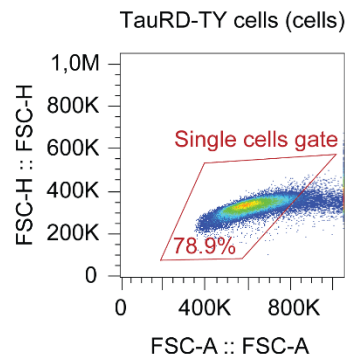

## 3. Exclusion of possible false positive FRET signal resulting from YFP excitation by the 405 nm laser (exclusion from P1 gate)<sup>1</sup>

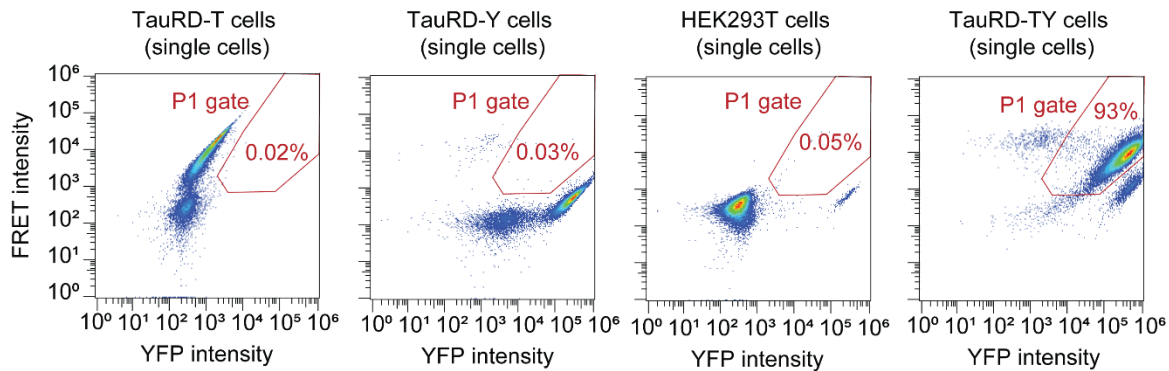

## 4. Selection of FRET positive cells from the P1 population using non-seeded cells as reference

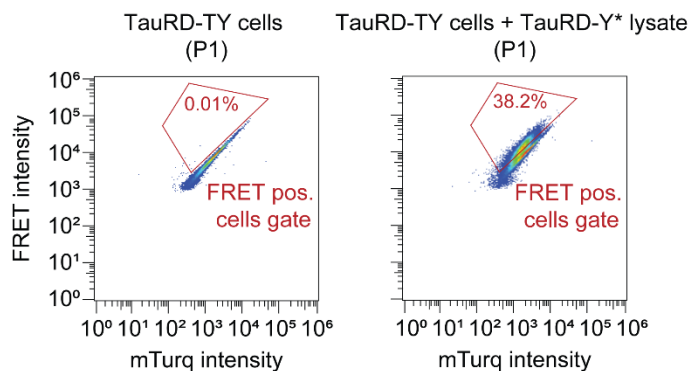

241 **Supplementary Fig. 13: Flow cytometry strategy for quantification of FRET positive cells.**

242 To measure the mTurquoise2 and FRET fluorescence signals, cells were excited with 405 nm laser

243 light and fluorescence was determined using 440/50 and 530/30 filters, respectively. To measure

244 the YFP fluorescence signal, cells were excited at 488 nm and emission was recorded using a

530/30 filter. For each sample, 50,000 single cells were analyzed, using a gating strategy recently described<sup>1,2</sup>. First, cells were selected (1), followed by single cell selection (2). After gating single cells, an additional gate (P1) was introduced to exclude YFP-only cells that show a false-positive signal in the FRET channel due to excitation at 405 nm using TauRD-T cells, TauRD-Y cells and HEK293T cells<sup>1,2</sup> as reference (3). The FRET positive gate was set by plotting the FRET fluorescence signal versus the mTurquoise2 fluorescence signal using non-seeded cells as reference (4). Note that some panels in (1)-(3) were recently published describing the gating strategy for a comparable experiment<sup>2</sup>.

#### Supplementary references

- 1 Banning, C. *et al.* A flow cytometry-based FRET assay to identify and analyse protein-protein interactions in living cells. *PLoS One* **5**, e9344 (2010).
- 2 Yuste-Checa, P. *et al.* The extracellular chaperone Clusterin enhances Tau aggregate seeding in a cellular model. *Nature Communications* **12**, 4863 (2021).

259 **Supplementary Table 1. TauRD-Y interactome in TauRD-Y\* cells**

260 List of proteins interacting with TauRD-Y in TauRD-Y\* cells at steady state determined by stable isotope labelling by amino acids in cell  
261 culture (SILAC). TauRD-Y cells were used as control. Normalized SILAC ratios of TauRD-Y\*/TauRD-Y [H/L] from 3 independent  
262 replicates are shown. Interactors were defined as proteins quantified in at least 2 out of 3 replicates with enrichment  $\geq 2$  fold. Proteins with  
263 known association to the ubiquitin-proteasome system are highlighted in green and VCP-cofactor complex in red. Intensity-based absolute  
264 quantification (iBAQ) values reflect measured molar protein amounts.

| Protein ID | Protein name                                                                     | Gene name | Fasta headers                                                                     | Unique peptides | Mol. weight [kDa] | Norm. ratio [H/L] Rep.1 | Norm. ratio [H/L] Rep.2 | Norm. ratio [H/L] Rep.3 | Median norm. ratio | iBAQ [H] Exp.1 | iBAQ [H] Exp.2 | iBAQ [H] Exp.3 |
|------------|----------------------------------------------------------------------------------|-----------|-----------------------------------------------------------------------------------|-----------------|-------------------|-------------------------|-------------------------|-------------------------|--------------------|----------------|----------------|----------------|
| Q9UNZ2;F2  | NSFL1 cofactor p47                                                               | NSFL1C    | sp Q9UNZ2 NSFL1_HUMAN NSFL1 cofactor p47 OS=HUMAN                                 | 14              | 40.572            | 42.702                  | 80.022                  | 11.719                  | 42.702             | 59143000       | 112180000      | 13783000       |
| Q9UQN3;A   | Charged multivesicular body protein 2b                                           | CHMP2B    | sp Q9UQN3 CHMP2B_HUMAN Charged multivesicular body protein 2b OS=HUMAN            | 4               | 23.906            | 18.201                  | 25.514                  | 11.839                  | 18.201             | 2093000        | 5417800        | 15472000       |
| P55072;C9I | Transitional endoplasmic reticulum ATPase                                        | VCP       | sp P55072 TERA_HUMAN Transitional endoplasmic reticulum ATPase OS=HUMAN           | 47              | 89.321            | 16.959                  | 43.344                  | 6.3181                  | 16.959             | 29193000       | 94165000       | 26411000       |
| Q9UNM6;J3  | 26S proteasome non-ATPase regulatory subunit 1                                   | PSMD13    | sp Q9UNM6 PSD13_HUMAN 26S proteasome non-ATPase regulatory subunit 1 OS=HUMAN     | 22              | 42.945            | 17.963                  | 16.071                  | 13.583                  | 16.071             | 9313200        | 17290000       | 5085700        |
| Q6PEV8     | Protein FAM199X                                                                  | FAM199X   | sp Q6PEV8 F199X_HUMAN Protein FAM199X OS=HUMAN                                    | 5               | 42.801            | 41.449                  | 15.154                  | 15.115                  | 15.154             | 9838300        | 30031000       | 10267000       |
| F8VUA2;Q9  | Charged multivesicular body protein 1a                                           | CHMP1A    | tr F8VUA2 F8VUA2_HUMAN Charged multivesicular body protein 1a OS=HUMAN            | 5               | 19.531            | 14.648                  | 19.186                  | 12.293                  | 14.648             | 25912000       | 113020000      | 38592000       |
| Q15773;F5H | Myeloid leukemia factor 2                                                        | MLF2      | sp Q15773 MLF2_HUMAN Myeloid leukemia factor 2 OS=HUMAN                           | 6               | 28.147            | 16.867                  | 13.819                  | 6.564                   | 13.819             | 74907000       | 153440000      | 42871000       |
| O43242;H0Y | 26S proteasome non-ATPase regulatory subunit 3                                   | PSMD3     | sp O43242 PSMD3_HUMAN 26S proteasome non-ATPase regulatory subunit 3 OS=HUMAN     | 34              | 60.977            | 13.413                  | 15.879                  | 6.9978                  | 13.413             | 21734000       | 50167000       | 10257000       |
| O00231;J3Q | 26S proteasome non-ATPase regulatory subunit 11                                  | PSMD11    | sp O00231 PSD11_HUMAN 26S proteasome non-ATPase regulatory subunit 11 OS=HUMAN    | 26              | 47.463            | 13.086                  | 22.385                  | 7.5615                  | 13.086             | 14133000       | 35102000       | 7362100        |
| P62191;G3V | 26S protease regulatory subunit 4                                                | PSMC1     | sp P62191 PRS4_HUMAN 26S proteasome regulatory subunit 4 OS=HUMAN                 | 20              | 49.184            | 12.739                  | 13.685                  | 6.7346                  | 12.739             | 6082800        | 18968000       | 4723500        |
| P17480     | Nucleolar transcription factor 1                                                 | UBTF      | sp P17480 UBF1_HUMAN Nucleolar transcription factor 1 OS=HUMAN                    | 22              | 89.405            | 12.209                  | 11.585                  | 7.1602                  | 11.585             | 94071000       | 144030000      | 43389000       |
| O14545;F8V | TRAF-type zinc finger domain-containing protein 1                                | TRAFD1    | sp O14545 TRAD1_HUMAN TRAF-type zinc finger domain-containing protein 1 OS=HUMAN  | 12              | 64.84             | 7.2319                  | 19.2                    | 11.522                  | 11.522             | 6914300        | 16022000       | 16301000       |
| Q13501;E7E | Sequestosome-1                                                                   | SQSTM1    | sp Q13501 SQSTM1_HUMAN Sequestosome-1 OS=HUMAN                                    | 16              | 47.687            | 9.6152                  | 17.975                  | 11.41                   | 11.41              | 27933000       | 113830000      | 115270000      |
| Q13200;C9I | 26S proteasome non-ATPase regulatory subunit 2                                   | PSMD2     | sp Q13200 PSMD2_HUMAN 26S proteasome non-ATPase regulatory subunit 2 OS=HUMAN     | 46              | 100.2             | 7.2067                  | 22.927                  | 11.267                  | 11.267             | 4555900        | 9942100        | 6380700        |
| H0Y6K2;A04 | Bromodomain-containing protein 2                                                 | BRD2      | tr H0Y6K2 H0Y6K2_HUMAN Bromodomain-containing protein 2 OS=HUMAN                  | 11              | 88.288            | 24.922                  | 7.6855                  | 10.958                  | 10.958             | 6685300        | 16169000       | 6613700        |
| H0YFD6;P4C | Trifunctional enzyme subunit alpha, mitochondrion                                | HADHA     | tr H0YFD6 H0YFD6_HUMAN Trifunctional enzyme subunit alpha, mitochondrion OS=HUMAN | 29              | 86.371            | 10.902                  | 11.422                  | 8.175                   | 10.902             | 45516000       | 92103000       | 31426000       |
| P55036;Q5V | 26S proteasome non-ATPase regulatory subunit 4                                   | PSMD4     | sp P55036 PSMD4_HUMAN 26S proteasome non-ATPase regulatory subunit 4 OS=HUMAN     | 14              | 40.736            | 12.228                  | 10.9                    | 3.7986                  | 10.9               | 19080000       | 82099000       | 8516700        |
| Q6QNY1;J3I | Biogenesis of lysosome-related organelles 1                                      | BLOC1S2   | sp Q6QNY1 BLIS2_HUMAN Biogenesis of lysosome-related organelles 1 OS=HUMAN        | 3               | 15.961            | 10.78                   | 15.848                  | 2.0051                  | 10.78              | 1892700        | 3652000        | 1718300        |
| P55084;F5G | Trifunctional enzyme subunit beta, mitochondrion                                 | HADHB     | sp P55084 ECHB_HUMAN Trifunctional enzyme subunit beta, mitochondrion OS=HUMAN    | 25              | 51.294            | 9.9693                  | 11.079                  | 8.0079                  | 9.9693             | 65103000       | 128900000      | 39724000       |
| P25788;G3V | Proteasome subunit alpha type-3                                                  | PSMA3     | sp P25788 PSA3_HUMAN Proteasome subunit alpha type-3 OS=HUMAN                     | 9               | 28.433            | 3.0605                  | 14.754                  | 9.9671                  | 9.9671             | 2846500        | 1743900        | 2866700        |
| A8MUA9;A8  | Small ubiquitin-related modifier 4; Small ubiquitin-related modifier 4 homolog 1 | SUMO3     | tr A8MUA9 A8MUA9_HUMAN SUMO3 suppressor of 34S OS=HUMAN                           | 1               | 15.317            | 8.4377                  | 11.126                  |                         | 9.78185            | 14432000       | 26087000       | 0              |
| Q8TAT6;J3L | Nuclear protein localization protein 4 homolog 1                                 | NPLOC4    | sp Q8TAT6 NPL4_HUMAN Nuclear protein localization protein 4 homolog 1 OS=HUMAN    | 17              | 68.119            | 3.9291                  | 15.451                  |                         | 9.69005            | 1208400        | 5604000        | 0              |
| P25789;H0Y | Proteasome subunit alpha type-4; Proteasome subunit alpha type-4                 | PSMA4     | sp P25789 PSA4_HUMAN Proteasome subunit alpha type-4 OS=HUMAN                     | 10              | 29.483            | 2.7706                  |                         | 16.307                  | 9.5388             | 4339400        | 0              | 4387000        |
| Q9UHD9     | Ubiquilin-2                                                                      | UBQLN2    | sp Q9UHD9 UBQLN2_HUMAN Ubiquilin-2 OS=HUMAN                                       | 11              | 65.695            | 6.6843                  | 11.794                  |                         | 9.23915            | 8201000        | 24600000       | 108990         |
| O14818;H0Y | Proteasome subunit alpha type-7                                                  | PSMA7     | sp O14818 PSA7_HUMAN Proteasome subunit alpha type-7 OS=HUMAN                     | 14              | 27.887            | 2.6045                  | 9.1585                  | 10.57                   | 9.1585             | 3845500        | 10551000       | 10021000       |
| Q9UID3;E9F | Vacuolar protein sorting-associated protein VPS51                                | VPS51     | sp Q9UID3 VPS51_HUMAN Vacuolar protein sorting-associated protein VPS51 OS=HUMAN  | 11              | 86.041            | 12.8                    | 5.2875                  |                         | 9.04375            | 603160         | 3513600        | 552200         |
| Q14596;B7Z | Next to BRCA1 gene 1 protein                                                     | NBR1      | sp Q14596 NBR1_HUMAN Next to BRCA1 gene 1 protein OS=HUMAN                        | 12              | 107.41            | 15.113                  |                         | 2.4528                  | 8.7829             | 0              | 12693000       | 12934000       |
| Q92890;C9I | Ubiquitin fusion degradation protein 1 homolog 1                                 | UFD1L     | sp Q92890 UFD1_HUMAN Ubiquitin recognition factor 1 OS=HUMAN                      | 9               | 34.5              | 11.411                  | 6.134                   |                         | 8.7725             | 785590         | 5835400        | 721170         |
| Q15008;C9I | 26S proteasome non-ATPase regulatory subunit 6                                   | PSMD6     | sp Q15008 PSMD6_HUMAN 26S proteasome non-ATPase regulatory subunit 6 OS=HUMAN     | 27              | 45.531            | 7.3639                  | 9.6008                  | 8.555                   | 8.555              | 13494000       | 32380000       | 6986900        |

265

266

Continued on next page

| Protein ID  | Protein name                                       | Gene name  | Fasta headers                                   | Unique peptides | Mol. weight [kDa] | Norm. ratio [H/L] | Rep.1 | Norm. ratio [H/L] | Rep.2 | Norm. ratio [H/L] | Rep.3 | Median norm. ratio | iBAQ [H]   | Exp.1 | iBAQ [H]   | Exp.2 | iBAQ [H]   | Exp.3 |
|-------------|----------------------------------------------------|------------|-------------------------------------------------|-----------------|-------------------|-------------------|-------|-------------------|-------|-------------------|-------|--------------------|------------|-------|------------|-------|------------|-------|
| Q96DX7      | Tripartite motif-containing protein 44             | TRIM44     | sp Q96DX7 TRI44_HUMAN Tripartite motif-contain  | 5               | 38.472            | 10.369            |       | 6.5983            |       |                   |       | 8.48365            | 708170     |       | 19187000   |       | 783500     |       |
| Q16643;D6f  | Drebrin                                            | DBN1       | sp Q16643 DREB_HUMAN Drebrin OS=Homo sapie      | 16              | 71.428            |                   |       | 13.93             |       | 2.7427            |       | 8.33635            | 123350     |       | 13631000   |       | 6342500    |       |
| A0A087X211  | 26S protease regulatory subunit 10B                | PSMG6      | tr A0A087X211 A0A087X211_HUMAN 26S proteasor    | 16              | 45.796            | 10.533            |       | 6.0398            |       |                   |       | 8.2864             | 2266900    |       | 10434000   |       | 743130     |       |
| P51665;H3B  | 26S proteasome non-ATPase regulatory sub           | PSMD7      | sp P51665 PSMD7_HUMAN 26S proteasome non-A      | 14              | 37.025            | 8.2466            |       | 13.713            |       | 6.6956            |       | 8.2466             | 9133800    |       | 34517000   |       | 6064400    |       |
| P35998;A0A  | 26S protease regulatory subunit 7                  | PSMC2      | sp P35998 PRS7_HUMAN 26S proteasome regulat     | 24              | 48.633            | 7.5017            |       | 8.0742            |       | 8.5178            |       | 8.0742             | 8531200    |       | 12549000   |       | 5021100    |       |
| B3KVL5;Q8I  | Zinc finger CCHC domain-containing protein ZCCHC10 |            | tr B3KVL5 B3KVL5_HUMAN Zinc finger, CCHC domi   | 1               | 20.308            |                   |       | 17.175            |       | 8.4956            |       | 7.83655            | 18527000   |       | 60508000   |       | 11466000   |       |
| Q8IXW5      | Putative RNA polymerase II subunit B1 CTD          | RPAP2      | sp Q8IXW5 RPAP2_HUMAN Putative RNA polymer      | 13              | 69.508            | 10.475            |       | 7.8181            |       | 3.3996            |       | 7.8181             | 1205400    |       | 8566200    |       | 4524400    |       |
| P62979;J3Q  | Ubiquitin-40S ribosomal protein S27a;Ubiqu         | RPS27A;UBB | sp P62979 RS27A_HUMAN Ubiquitin-40S ribosoma    | 10              | 17.965            | 9.4683            |       | 7.6945            |       | 4.1911            |       | 7.6945             | 3164100000 |       | 7019100000 |       | 1951400000 |       |
| Q99460;A0I  | 26S proteasome non-ATPase regulatory sub           | PSMD1      | sp Q99460 PSMD1_HUMAN 26S proteasome non-A      | 42              | 105.84            | 6.684             |       | 7.415             |       | 7.8358            |       | 7.415              | 3058500    |       | 12531000   |       | 2851500    |       |
| P43686      | 26S protease regulatory subunit 6B                 | PSMC4      | sp P43686 PRS6B_HUMAN 26S proteasome regul      | 21              | 47.366            | 8.4576            |       | 2.5541            |       | 6.7907            |       | 6.7907             | 1137200    |       | 10458000   |       | 617140     |       |
| R4GMRS5;K7  | 26S proteasome non-ATPase regulatory sub           | PSMD8      | tr R4GMRS5 R4GMRS5_HUMAN 26S proteasome non     | 10              | 32.551            | 1.3779            |       | 6.6145            |       | 13.37             |       | 6.6145             | 491820     |       | 3751000    |       | 6211100    |       |
| POCAP2;H8I  | DNA-directed RNA polymerase II subunit Gf          | POLR2M;GCC | sp POCAP2 GRL1A_HUMAN DNA-directed RNA pol      | 4               | 41.739            | 6.9552            |       | 6.1579            |       |                   |       | 6.55655            | 2999600    |       | 6478700    |       | 0          |       |
| P49721;A0A  | Proteasome subunit beta type-2                     | PSMB2      | sp P49721 PSB2_HUMAN Proteasome subunit bet     | 10              | 22.836            | 2.6138            |       | 10.075            |       |                   |       | 6.3444             | 526870     |       | 3115400    |       | 1949400    |       |
| Q9UQ35;J3L  | Serine/arginine repetitive matrix protein 2        | SRRM2      | sp Q9UQ35 SRRM2_HUMAN Serine/arginine repet     | 44              | 299.61            | 8.8182            |       | 4.1061            |       | 6.3418            |       | 6.3418             | 40059000   |       | 69443000   |       | 34477000   |       |
| O75487      | Glypican-4;Secreted glypican-4                     | GPC4       | sp O75487 GPC4_HUMAN Glypican-4 OS=Homo saj     | 13              | 62.411            | 6.1176            |       | 9.697             |       | 5.2264            |       | 6.1176             | 12306000   |       | 31449000   |       | 4359700    |       |
| Q9H307;G3I  | Pinin                                              | PNN        | sp Q9H307 PININ_HUMAN Pinin OS=Homo sapien      | 39              | 81.627            | 6.4613            |       | 5.9829            |       | 3.8631            |       | 5.9829             | 180190000  |       | 359840000  |       | 205880000  |       |
| Q99615;K7E  | DnaJ homolog subfamily C member 7                  | DNAJC7     | sp Q99615 DNJC7_HUMAN DnaJ homolog subfami      | 35              | 56.44             | 32.017            |       | 5.9433            |       | 3.8506            |       | 5.9433             | 58381000   |       | 56886000   |       | 13723000   |       |
| O95816      | BAG family molecular chaperone regulator           | BAG2       | sp O95816 BAG2_HUMAN BAG family molecular cf    | 9               | 23.772            | 5.7371            |       | 8.5666            |       | 3.8905            |       | 5.7371             | 10758000   |       | 36658000   |       | 8833600    |       |
| Q9BYN8      | 28S ribosomal protein S26, mitochondrial           | MRPS26     | sp Q9BYN8 RT26_HUMAN 28S ribosomal protein S    | 7               | 24.211            | 5.6963            |       | 5.8954            |       | 3.1697            |       | 5.6963             | 15678000   |       | 55778000   |       | 11868000   |       |
| P10644;K7E  | cAMP-dependent protein kinase type I- $\alpha$ lph | PRKAR1A    | sp P10644 KAP0_HUMAN cAMP-dependent protei      | 12              | 42.981            | 5.6698            |       | 8.1797            |       | 2.4289            |       | 5.6698             | 1804900    |       | 8873600    |       | 3456600    |       |
| A0A0C4DG6   | ADP-ribosylation factor-like protein 6-inter       | ARL6IP4    | tr A0A0C4DG62 A0A0C4DG62_HUMAN ADP-ribosy       | 5               | 24.591            | 5.6534            |       | 5.8168            |       | 2.4357            |       | 5.6534             | 11791000   |       | 37307000   |       | 7853000    |       |
| Q15545      | Transcription initiation factor TFIID subunit      | TAF7       | sp Q15545 TAF7_HUMAN Transcription initiation f | 5               | 40.259            | 6.7383            |       | 4.5475            |       |                   |       | 5.6429             | 1917000    |       | 3824800    |       | 262590     |       |
| F5H442;Q9S  | Tumor susceptibility gene 101 protein              | TSG101     | tr F5H442 F5H442_HUMAN Tumor susceptibility ge  | 8               | 40.917            | 6.9756            |       | 3.423             |       |                   |       | 5.1993             | 1298100    |       | 2512100    |       | 0          |       |
| Q14677;H0N  | Clathrin interactor 1                              | CLINT1     | sp Q14677 EPN4_HUMAN Clathrin interactor 1 OS=  | 17              | 68.259            | 4.5671            |       | 5.1051            |       | 4.8361            |       | 4.8361             | 483270     |       | 1390800    |       | 0          |       |
| Q16531;F5C  | DNA damage-binding protein 1                       | DDB1       | sp Q16531 DDB1_HUMAN DNA damage-binding pr      | 51              | 126.97            | 5.1552            |       | 4.8124            |       | 4.7395            |       | 4.8124             | 2260500    |       | 2015000    |       | 818320     |       |
| O14646;H0N  | Chromodomain-helicase-DNA-binding prot             | CHD1       | sp O14646 CHD1_HUMAN Chromodomain-helicase      | 22              | 196.69            | 4.667             |       | 5.6929            |       | 3.5182            |       | 4.667              | 1212300    |       | 6836700    |       | 855680     |       |
| G3V5Z7;P6I  | Proteasome subunit alpha type;Proteasome           | PSMA6      | tr G3V5Z7 G3V5Z7_HUMAN Proteasome subunit a     | 12              | 28.147            |                   |       | 5.4361            |       | 3.7845            |       | 4.6103             | 0          |       | 986560     |       | 3211200    |       |
| P17980;E9P  | 26S protease regulatory subunit 6A                 | PSMC3      | sp P17980 PRS6A_HUMAN 26S proteasome regula     | 21              | 49.203            | 5.2382            |       | 3.8803            |       |                   |       | 4.55925            | 2297800    |       | 7983700    |       | 563940     |       |
| O00232;J3K  | 26S proteasome non-ATPase regulatory sub           | PSMD12     | sp O00232 PSD12_HUMAN 26S proteasome non-A      | 22              | 52.904            | 4.4642            |       | 2.2919            |       | 13.215            |       | 4.4642             | 5157500    |       | 5534500    |       | 3641700    |       |
| P61964;V9C  | WD repeat-containing protein 5                     | WDR5       | sp P61964 WDR5_HUMAN WD repeat-containing p     | 5               | 36.588            | 2.7665            |       | 5.5202            |       |                   |       | 4.14335            | 1116200    |       | 6218500    |       | 163100     |       |
| O00487;C9J  | 26S proteasome non-ATPase regulatory sub           | PSMD14     | sp O00487 PSDE_HUMAN 26S proteasome non-AT      | 10              | 34.577            | 4.4008            |       | 3.6454            |       |                   |       | 4.0231             | 2763600    |       | 4175800    |       | 1273000    |       |
| P62195;J3Q  | 26S protease regulatory subunit 8                  | PSMC5      | sp P62195 PRS8_HUMAN 26S proteasome regulat     | 23              | 45.626            | 4.5333            |       | 4.0178            |       | 2.4837            |       | 4.0178             | 2401900    |       | 10162000   |       | 3258800    |       |
| P24928      | DNA-directed RNA polymerase II subunit Rf          | POLR2A     | sp P24928 RPB1_HUMAN DNA-directed RNA polyr     | 51              | 217.17            | 3.9675            |       | 4.1625            |       | 3.3865            |       | 3.9675             | 5036400    |       | 22719000   |       | 4400000    |       |
| O14974;F8V  | Protein phosphatase 1 regulatory subunit 1         | PPP1R12A   | sp O14974 MYPT1_HUMAN Protein phosphatase 1     | 15              | 115.28            | 3.6323            |       | 4.1458            |       |                   |       | 3.88905            | 135210     |       | 738040     |       | 0          |       |
| Q5VIR6;F6V  | Vacuolar protein sorting-associated protein        | VPS53      | sp Q5VIR6 VPS53_HUMAN Vacuolar protein sortin   | 10              | 79.652            |                   |       | 2.3872            |       | 5.2434            |       | 3.8153             | 0          |       | 867750     |       | 158630     |       |
| Q8WV44;H3E  | E3 ubiquitin-protein ligase TRIM41                 | TRIM41     | sp Q8WV44 TRI41_HUMAN E3 ubiquitin-protein li   | 5               | 71.669            | 4.3208            |       | 3.4885            |       | 3.7734            |       | 3.7734             | 613000     |       | 252640     |       | 1261800    |       |
| F8W118;F8V  | V59;B729C2;F8VRJ2                                  | NAP1L1     | tr F8W118 F8W118_HUMAN Nucleosome assembl       | 12              | 24.694            | 3.6447            |       | 4.8952            |       | 3.4073            |       | 3.6447             | 4807500    |       | 20158000   |       | 2227100    |       |
| E9PNW4;A/C  | CD59 glycoprotein                                  | CD59       | tr E9PNW4 E9PNW4_HUMAN Uncharacterized pro      | 4               | 11.985            |                   |       | 4.7462            |       |                   |       | 3.44095            | 5131200    |       | 54954000   |       | 35045000   |       |
| Q96BQ5      | Coiled-coil domain-containing protein 127          | CCDC127    | sp Q96BQ5 CC127_HUMAN Coiled-coil domain-coi    | 4               | 30.834            | 4.0401            |       | 2.7807            |       |                   |       | 3.4104             | 3768100    |       | 3178900    |       | 697410     |       |
| O43164      | E3 ubiquitin-protein ligase Praja-2                | PJA2       | sp O43164 PJA2_HUMAN E3 ubiquitin-protein liga  | 15              | 78.213            | 3.3397            |       | 6.1296            |       | 2.2392            |       | 3.3397             | 4791500    |       | 29710000   |       | 8235700    |       |
| B8Z2D4;Q8K  | Tax1-binding protein 1                             | TAX1BP1    | tr B8Z2D4 B8Z2D4_HUMAN Tax1-binding protein 1   | 14              | 93.609            | 9.5213            |       | 3.2831            |       | 3.1608            |       | 3.2831             | 409770     |       | 4896800    |       | 4112000    |       |
| P62857      | 40S ribosomal protein S28                          | RPS28      | sp P62857 RS28_HUMAN 40S ribosomal protein S2   | 2               | 7.8409            | 3.7217            |       | 3.2677            |       | 1.1842            |       | 3.2677             | 18987000   |       | 32783000   |       | 6557100    |       |
| P62873;F6U  | Guanine nucleotide-binding protein G(i)/G          | GNB1       | sp P62873 GBB1_HUMAN Guanine nucleotide-bin     | 13              | 37.377            | 3.2364            |       | 4.2746            |       | 1.6165            |       | 3.2364             | 2812200    |       | 17175000   |       | 35389000   |       |
| Q7L7X3;J3Q  | Serine/threonine-protein kinase TAO1               | TAOK1      | sp Q7L7X3 TAOK1_HUMAN Serine/threonine-prot     | 15              | 116.07            | 1.3856            |       | 3.2072            |       | 3.0804            |       | 3.0804             | 2889600    |       | 6633200    |       | 6110200    |       |
| O75955;A0I  | Flotillin-1                                        | FLOT1      | sp O75955 FLOT1_HUMAN Flotillin-1 OS=Homo saj   | 16              | 47.355            | 3.0802            |       | 3.6951            |       | 1.7534            |       | 3.0802             | 11366000   |       | 21730000   |       | 4780700    |       |
| Q12899;A2J  | Tripartite motif-containing protein 26             | TRIM26     | sp Q12899 TRI26_HUMAN Tripartite motif-contain  | 7               | 62.165            | 4.126             |       |                   |       | 2.001             |       | 3.0635             | 1519900    |       | 2525100    |       | 1427900    |       |
| Q99986;H0N  | Serine/threonine-protein kinase VRK1               | VRK1       | sp Q99986 VRK1_HUMAN Serine/threonine-prote     | 14              | 45.476            | 3.4612            |       | 3.0568            |       | 1.1048            |       | 3.0568             | 2738700    |       | 26700000   |       | 18471000   |       |
| C9J2Y9;P3QI | DNA-directed RNA polymerase;DNA-direct             | POLR2B     | tr C9J2Y9 C9J2Y9_HUMAN DNA-directed RNA pol     | 34              | 133.06            | 3.7497            |       | 3.0177            |       | 3.0513            |       | 3.0513             | 4282800    |       | 9848300    |       | 392790     |       |
| H3BVB0;H3I  | RNA-binding protein with serine-rich doma          | RNP51      | tr H3BVB0 H3BVB0_HUMAN RNA-binding protein      | 6               | 24.561            | 3.0441            |       | 3.3076            |       | 2.5543            |       | 3.0441             | 139510000  |       | 204410000  |       | 94293000   |       |
| Q9UBI6      | Guanine nucleotide-binding protein G(i)/G          | GNG12      | sp Q9UBI6 GBG12_HUMAN Guanine nucleotide-bi     | 3               | 8.0061            | 3.0438            |       | 4.9367            |       | 2.0117            |       | 3.0438             | 3890300    |       | 34430000   |       | 84342000   |       |

267

268

Continued on next page

| Protein ID                                     | Protein name                                       | Gene name    | Fasta headers                                   | Unique peptides | Mol. weight [kDa] | Norm. ratio [H/L] | Rep.1 | Norm. ratio [H/L] | Rep.2 | Norm. ratio [H/L] | Rep.3 | Median norm. ratio | iBAQ [H]  | Exp.1     | iBAQ [H]   | Exp.2  | iBAQ [H] | Exp.3 |
|------------------------------------------------|----------------------------------------------------|--------------|-------------------------------------------------|-----------------|-------------------|-------------------|-------|-------------------|-------|-------------------|-------|--------------------|-----------|-----------|------------|--------|----------|-------|
| I1E4Y6;Q6Y                                     | PERQ amino acid-rich with GYF domain-cont          | GIGYF2       | tr I1E4Y6 I1E4Y6_HUMAN GRB10-interacting GYF pi | 11              | 152.53            | 3.4506            |       | 2.6293            |       |                   |       | 3.03995            | 571610    |           | 1017200    |        | 0        |       |
| P16403;P10                                     | Histone H1.2;Histone H1.4                          | HIST1H1C;HIS | sp P16403 H12_HUMAN Histone H1.2 OS=Homo sa     | 12              | 21.364            | 3.0264            |       | 2.2983            |       | 3.593             |       | 3.0264             | 103310000 | 303900000 | 129810000  |        |          |       |
| P19387;H3B                                     | DNA-directed RNA polymerase II subunit RF          | POLR2C       | sp P19387 RPB3_HUMAN DNA-directed RNA polyr     | 10              | 31.441            | 3.0233            |       | 3.8035            |       | 2.6379            |       | 3.0233             | 11207000  | 18173000  | 28795000   |        |          |       |
| Q5HYB6                                         | DKFZp686J13                                        | DKFZp686J13  | tr Q5HYB6 Q5HYB6_HUMAN Epididymis luminal pr    | 21              | 27.175            | 4.5555            |       | 2.9635            |       | 2.9779            |       | 2.9779             | 1471400   | 6297900   | 1443000    |        |          |       |
| P06748;E5R                                     | Nucleophosmin                                      | NPM1         | sp P06748 NPM_HUMAN Nucleophosmin OS=Horr       | 17              | 32.575            | 3.5369            |       | 2.9192            |       | 1.7384            |       | 2.9192             | 45741000  | 124660000 | 102380000  |        |          |       |
| J3QLD9;E7E                                     | FLOTillin-2                                        | FLOT2        | tr J3QLD9 J3QLD9_HUMAN FLOTillin-2 OS=Homo sa   | 15              | 47.142            | 2.9067            |       | 4.1686            |       | 1.6969            |       | 2.9067             | 8440000   | 26271000  | 11510000   |        |          |       |
| P62879;C9J                                     | Guanine nucleotide-binding protein G(i)/G          | GNB2         | sp P62879 GBB2_HUMAN Guanine nucleotide-bini    | 12              | 37.331            | 2.9058            |       | 4.836             |       | 1.5201            |       | 2.9058             | 4881400   | 14551000  | 15388000   |        |          |       |
| Q53H12;E9F                                     | Acylglycerol kinase, mitochondrial                 | AGK          | sp Q53H12 AGK_HUMAN Acylglycerol kinase, mitc   | 18              | 47.137            | 1.1258            |       | 2.8627            |       | 4.0535            |       | 2.8627             | 4820100   | 15152000  | 13972000   |        |          |       |
| Q13112                                         | Chromatin assembly factor 1 subunit B              | CHAF1B       | sp Q13112 CAF1B_HUMAN Chromatin assembly fa     | 4               | 61.492            | 2.844             |       | 2.8809            |       |                   |       | 2.86245            | 512590    |           | 77757      |        | 0        |       |
| AOA087WV;V                                     | DNA-directed RNA polymerases I, II, and III        | POLR2E       | tr AOA087WVZ9 AOA087WVZ9_HUMAN DNA-direc        | 7               | 21.459            | 3.1167            |       | 2.4935            |       |                   |       | 2.8051             | 3322300   | 15849000  |            | 0      |          |       |
| Q92820                                         | Gamma-glutamyl hydrolase                           | GGH          | sp Q92820 GGH_HUMAN Gamma-glutamyl hydroli      | 8               | 35.964            | 2.8025            |       | 5.1253            |       | 2.0979            |       | 2.8025             | 2133200   | 7381800   | 1489700    |        |          |       |
| Q96GA3;A0                                      | Protein LTV1 homolog                               | LTV1         | sp Q96GA3 LTV1_HUMAN Protein LTV1 homolog C     | 15              | 54.854            | 1.3874            |       | 3.0356            |       | 2.7805            |       | 2.7805             | 11848000  | 15414000  | 11793000   |        |          |       |
| P60709;A0A                                     | Actin, cytoplasmic 1;Actin, cytoplasmic 1, N- ACTB | ACTB         | sp P60709 ACTB_HUMAN Actin, cytoplasmic 1 OS=   | 27              | 41.736            | 1.2178            |       | 3.5005            |       | 2.7751            |       | 2.7751             | 11323000  | 36019000  | 20782000   |        |          |       |
| Added01;CON                                    | _Q9U6Y5;I3L170                                     |              | tr Added01 TauYfp_HUMAN Tau Yfp                 | 39              | 43.256            | 3.5063            |       | 2.7256            |       | 2.1606            |       | 2.7256             | 413010000 | 891400000 | 3833400000 |        |          |       |
| Q99613;B5A                                     | Eukaryotic translation initiation factor 3 sub     | EIF3C;EIF3CL | sp Q99613 EIF3C_HUMAN Eukaryotic translation ir | 33              | 105.34            | 2.5577            |       | 2.8357            |       |                   |       | 2.6967             | 855670    |           | 4670000    |        | 443520   |       |
| P28066                                         | Proteasome subunit alpha type-5                    | PSMA5        | sp P28066 PSA5_HUMAN Proteasome subunit alpi    | 13              | 26.411            |                   |       | 3.108             |       | 2.254             |       | 2.681              | 713200    | 3627100   | 526020     |        |          |       |
| Q9HCM4                                         | Band 4.1-like protein 5                            | EPB41L5      | sp Q9HCM4 E41L5_HUMAN Band 4.1-like protein 5   | 9               | 81.855            | 2.1785            |       | 3.0182            |       |                   |       | 2.59835            | 227100    |           | 3722200    |        | 0        |       |
| AOA087WVY                                      | Slit homolog 2 protein;Slit homolog 2 prote        | SLIT2        | tr AOA087WVY5 AOA087WVY5_HUMAN Slit homol       | 9               | 159.98            | 2.0219            |       | 3.1071            |       |                   |       | 2.5645             | 487410    | 1400300   | 599630     |        |          |       |
| AOA1W2PQ                                       | DNA repair protein RAD50                           | RAD50        | tr AOA1W2PQ90 AOA1W2PQ90_HUMAN Uncharact        | 25              | 142.94            | 2.5131            |       | 3.214             |       | 0.89296           |       | 2.5131             | 1048700   | 5250600   | 1514700    |        |          |       |
| Q9H0U4;E9I                                     | Ras-related protein Rab-1B;Putative Ras-re         | RAB1B;RAB1B  | sp Q9H0U4 RAB1B_HUMAN Ras-related protein R     | 12              | 22.171            |                   |       | 2.7446            |       |                   |       | 2.1603             | 45245     | 682330    | 3902100    | 564680 |          |       |
| Q13823;H0N                                     | Nucleolar GTP-binding protein 2                    | GNL2         | sp Q13823 NOG2_HUMAN Nucleolar GTP-binding      | 18              | 83.654            | 2.5228            |       | 2.3703            |       |                   |       | 2.44655            | 504360    | 3938100   | 57885      |        |          |       |
| Q07021;I3L                                     | Complement component 1 Q subcomponen               | C1QB         | sp Q07021 C1QB_HUMAN Complement compone         | 10              | 31.362            | 2.1285            |       | 5.1114            |       | 2.4395            |       | 2.4395             | 5133600   | 39902000  | 12700000   |        |          |       |
| Q72417                                         | Nuclear fragile X mental retardation-interac       | NUFIP2       | sp Q72417 NUFIP2_HUMAN Nuclear fragile X ment   | 15              | 76.12             | 2.9962            |       | 2.4364            |       | 2.0328            |       | 2.4364             | 5829600   | 7837800   | 5467700    |        |          |       |
| P08670;B0Y                                     | Vimentin                                           | VIM          | sp P08670 VIME_HUMAN Vimentin OS=Homo sapi      | 45              | 53.651            | 2.4027            |       | 2.6728            |       | 1.6894            |       | 2.4027             | 59024000  | 131930000 | 146780000  |        |          |       |
| P19525;C9J                                     | Interferon-induced, double-stranded RNA-; EIF2AK2  |              | sp P19525 E2AK2_HUMAN Interferon-induced, do    | 12              | 62.094            | 2.5648            |       | 2.384             |       | 2.0421            |       | 2.384              | 145870    |           | 749090     |        | 114650   |       |
| Q01082                                         | Spectrin beta chain, non-erythrocytic 1            | SPTBN1       | sp Q01082 SPTB2_HUMAN Spectrin beta chain, no   | 120             | 274.61            | 2.354             |       | 5.0002            |       | 1.5658            |       | 2.354              | 14363000  | 46226000  | 27935000   |        |          |       |
| AOA0D95F54;AOA0D95GF6;AOA0D95FF6;AOA0D95FH4;AO | SPTAN1                                             |              | tr AOA0D95F54 AOA0D95F54_HUMAN Spectrin alpi    | 132             | 282.83            | 2.3502            |       | 5.0256            |       | 1.4746            |       | 2.3502             | 16833000  | 62862000  | 26440000   |        |          |       |
| P07948;E5R                                     | Tyrosine-protein kinase Lyn                        | LYN          | sp P07948 LYN_HUMAN Tyrosine-protein kinase L   | 12              | 58.573            |                   |       | 2.3857            |       | 2.2951            |       | 2.3404             | 0         | 1032300   | 2217900    |        |          |       |
| Q9UN86;D6                                      | Ras GTPase-activating protein-binding prote        | G3BP2        | sp Q9UN86 G3BP2_HUMAN Ras GTPase-activating     | 11              | 54.12             | 2.3338            |       | 1.3159            |       | 2.5495            |       | 2.3338             | 8722900   | 13070000  | 6033900    |        |          |       |
| P07900;G3V                                     | Heat shock protein HSP 90-alpha                    | HSP90AA1     | sp P07900 HS90A_HUMAN Heat shock protein HSP    | 63              | 84.659            | 2.277             |       | 4.0858            |       | 2.008             |       | 2.277              | 6729400   | 12647000  | 4596800    |        |          |       |
| P46013                                         | Antigen Ki-67                                      | MKI67        | sp P46013 KI67_HUMAN Proliferation marker prot  | 17              | 358.69            | 2.3191            |       | 2.2468            |       | 2.2169            |       | 2.2468             | 524560    | 475360    | 44507      |        |          |       |
| P60228;E5R                                     | Eukaryotic translation initiation factor 3 sub     | EIF3E        | sp P60228 EIF3E_HUMAN Eukaryotic translation in | 25              | 52.22             | 2.3804            |       | 2.2127            |       | 1.9171            |       | 2.2127             | 1089300   | 1573400   | 1367200    |        |          |       |
| P49916;K7E                                     | DNA ligase 3                                       | LIG3         | sp P49916 DNL3_HUMAN DNA ligase 3 OS=Homo       | 8               | 112.91            | 2.9178            |       | 2.203             |       | 2.1767            |       | 2.203              | 1532800   | 1039900   | 946440     |        |          |       |
| Q5RKV6                                         | Exosome complex component MTR3                     | EXOSC6       | sp Q5RKV6 EXOS6_HUMAN Exosome complex con       | 6               | 28.235            | 2.3573            |       | 2.1818            |       | 2.111             |       | 2.1818             | 11071000  | 15292000  | 4620400    |        |          |       |
| P12931                                         | Proto-oncogene tyrosine-protein kinase Src         | SRC          | sp P12931 SRC_HUMAN Proto-oncogene tyrosine-    | 8               | 59.834            | 2.168             |       | 4.1415            |       | 1.8886            |       | 2.168              | 748320    | 2601200   | 1702500    |        |          |       |
| P63092;Q5J                                     | Guanine nucleotide-binding protein G(s) su         | GNA3         | sp P63092 GNA52_HUMAN Guanine nucleotide-bi     | 13              | 45.664            | 2.1627            |       | 4.1417            |       | 1.5402            |       | 2.1627             | 1488700   | 9048500   | 3740200    |        |          |       |
| O75531;E9P                                     | Barrier-to-autointegration factor;Barrier-to-      | BANF1        | sp O75531 BAF_HUMAN Barrier-to-autointegratio   | 6               | 10.058            | 2.1605            |       | 2.4895            |       | 1.4442            |       | 2.1605             | 167700000 | 464450000 | 175040000  |        |          |       |
| Q9Y265;E7E                                     | RuvB-like 1                                        | RUVBL1       | sp Q9Y265 RUVB1_HUMAN RuvB-like 1 OS=Homo       | 24              | 50.227            | 1.8486            |       | 2.1597            |       | 2.5745            |       | 2.1597             | 2800700   | 6342500   | 382330     |        |          |       |
| O14578;H7E                                     | Citron Rho-interacting kinase                      | CIT          | sp O14578 CTRO_HUMAN Citron Rho-interacting k   | 11              | 231.43            | 3.1776            |       | 2.1397            |       | 0.96079           |       | 2.1397             | 57864     | 292140    | 49921      |        |          |       |
| P27986;H0Y                                     | Phosphatidylinositol 3-kinase regulatory su        | PIK3R1       | sp P27986 P85A_HUMAN Phosphatidylinositol 3-k   | 6               | 83.597            | 1.5657            |       | 2.1169            |       | 2.5085            |       | 2.1169             | 745890    | 11166000  | 1210500    |        |          |       |
| Q6WCQ1;J3                                      | Myosin phosphatase Rho-interacting protei          | MPRIIP       | sp Q6WCQ1 MPRIIP_HUMAN Myosin phosphatase       | 12              | 116.53            | 2.1049            |       | 2.173             |       | 0.79734           |       | 2.1049             | 588250    | 1624600   | 104110     |        |          |       |
| P08754                                         | Guanine nucleotide-binding protein G(k) su         | GNAI3        | sp P08754 GNAI3_HUMAN Guanine nucleotide-bir    | 15              | 40.532            | 2.0157            |       | 4.9059            |       | 2.0813            |       | 2.0813             | 19273000  | 75469000  | 42160000   |        |          |       |
| O15234;J3K                                     | Protein CASC3                                      | CASC3        | sp O15234 CASC3_HUMAN Protein CASC3 OS=Horr     | 8               | 76.277            | 2.067             |       | 2.0138            |       | 2.7423            |       | 2.067              | 698630    | 2073400   | 4126900    |        |          |       |
| P17987;E7E                                     | T-complex protein 1 subunit alpha                  | TCP1         | sp P17987 TCPA_HUMAN T-complex protein 1 sub    | 34              | 60.343            | 1.5294            |       | 2.2873            |       | 2.0582            |       | 2.0582             | 485300    | 1703400   | 621710     |        |          |       |
| Q5SRQ6;P6                                      | Casein kinase II subunit beta                      | CSNK2B;CSN   | tr Q5SRQ6 Q5SRQ6_HUMAN Casein kinase II subui   | 8               | 26.925            | 2.0436            |       | 2.4349            |       | 1.2233            |       | 2.0436             | 5899500   | 15187000  | 987590     |        |          |       |
| P08238;Q58                                     | Heat shock protein HSP 90-beta                     | HSP90AB1     | sp P08238 HS90B_HUMAN Heat shock protein HSP    | 64              | 83.263            | 1.9891            |       | 2.9312            |       | 2.02              |       | 2.02               | 7615400   | 29148000  | 15600000   |        |          |       |
| O95425;A0F                                     | Supervillin                                        | SVIL         | sp O95425 SVIL_HUMAN Supervillin OS=Homo sap    | 9               | 247.74            | 1.4281            |       | 3.0818            |       | 2.0134            |       | 2.0134             | 360680    | 1636100   | 213390     |        |          |       |
| Q14676;A2J                                     | Mediator of DNA damage checkpoint protei           | MDC1         | sp Q14676 MDC1_HUMAN Mediator of DNA dama       | 20              | 226.66            | 2.1653            |       | 2.0075            |       | 1.5305            |       | 2.0075             | 303620    | 152960    | 60101      |        |          |       |
| Q14008;H0N                                     | Cytoskeleton-associated protein 5                  | CKAP5        | sp Q14008 CKAP5_HUMAN Cytoskeleton-associat     | 72              | 225.49            | 1.7242            |       | 2.0021            |       | 2.3599            |       | 2.0021             | 325010    | 2252600   | 1461800    |        |          |       |



271 **Uncropped scans of blots**

272 Supplementary Fig. 1c

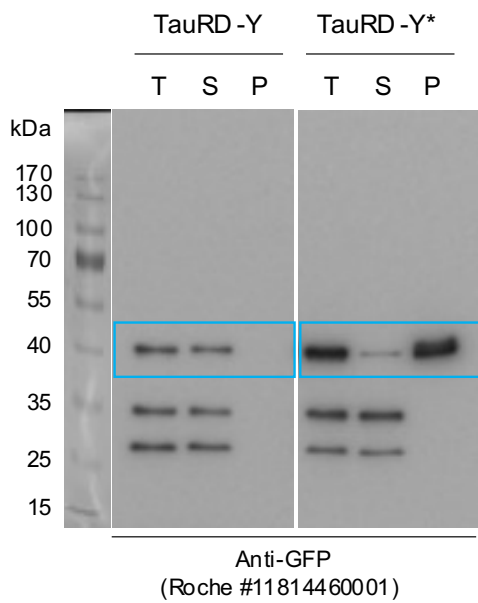

Supplementary Fig. 1e

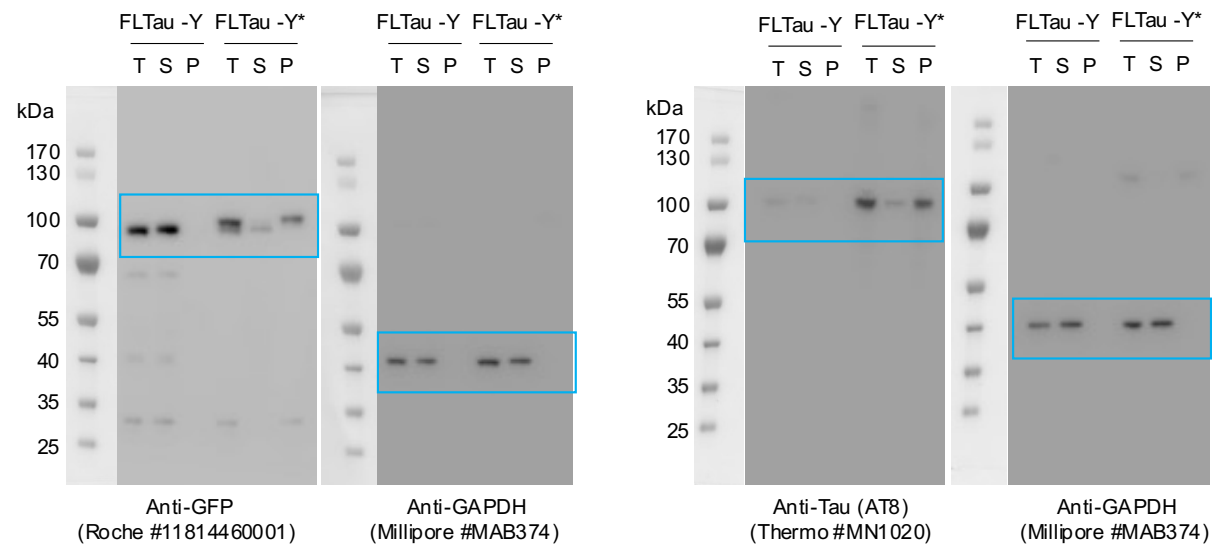

Supplementary Fig. 3a

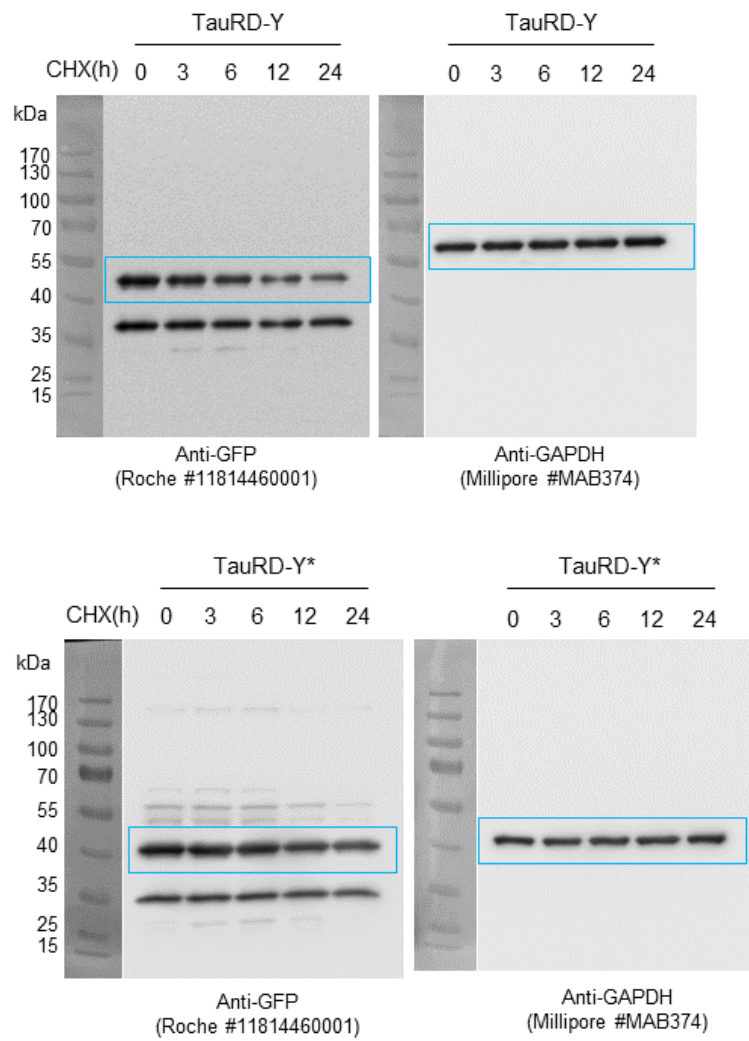

Supplementary Fig. 3b

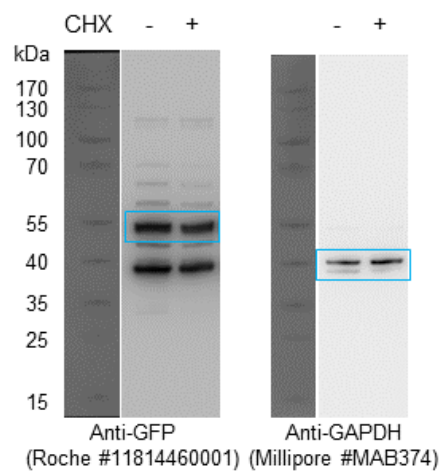

Supplementary Fig. 3c

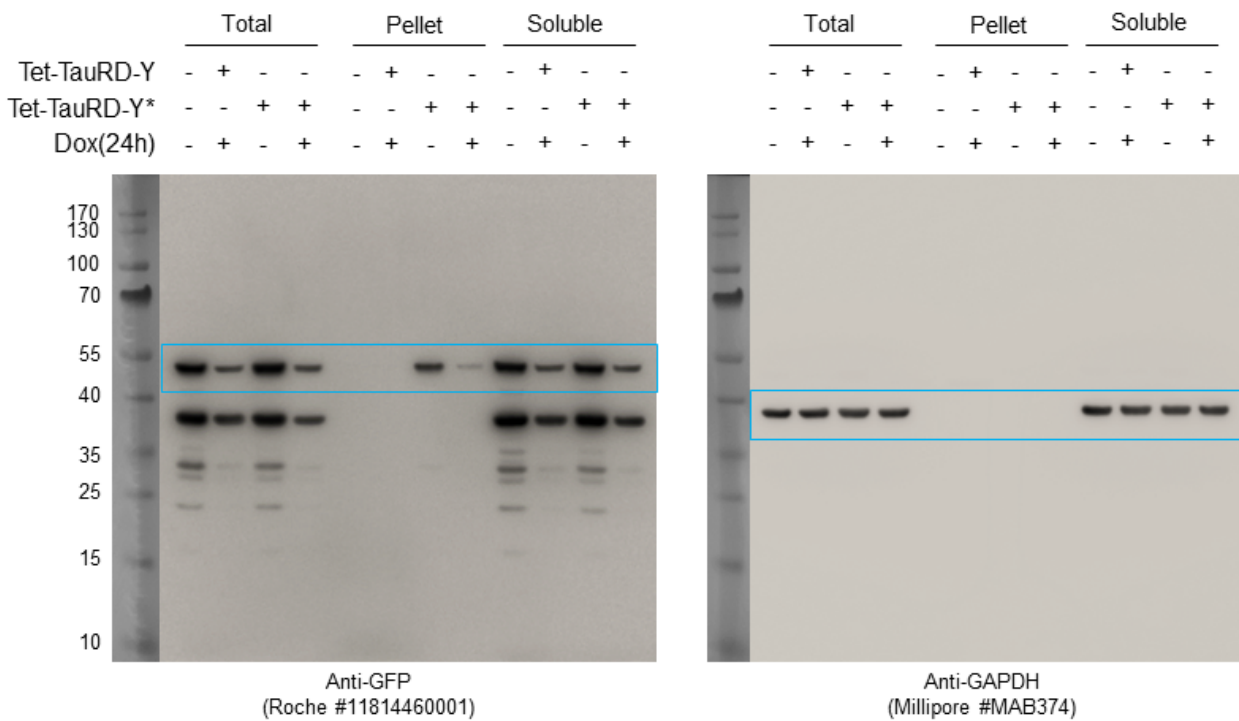

Supplementary Fig. 3c

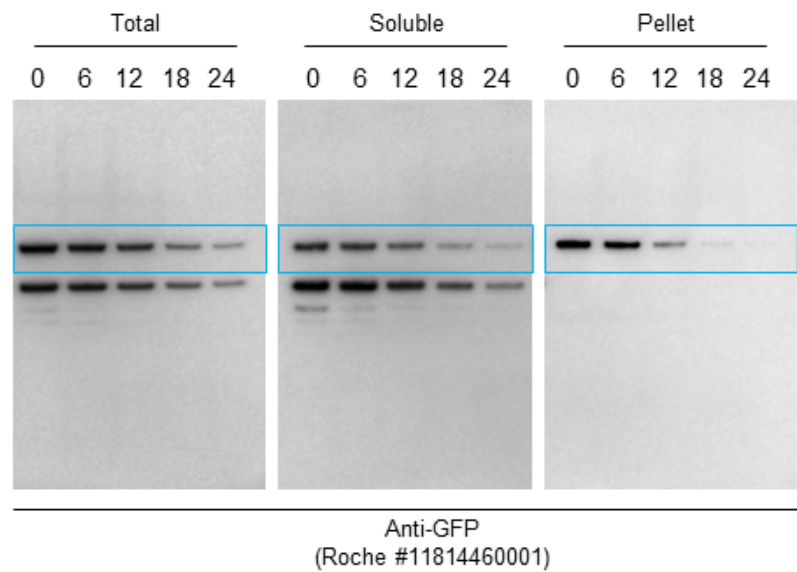

Supplementary Fig. 4a

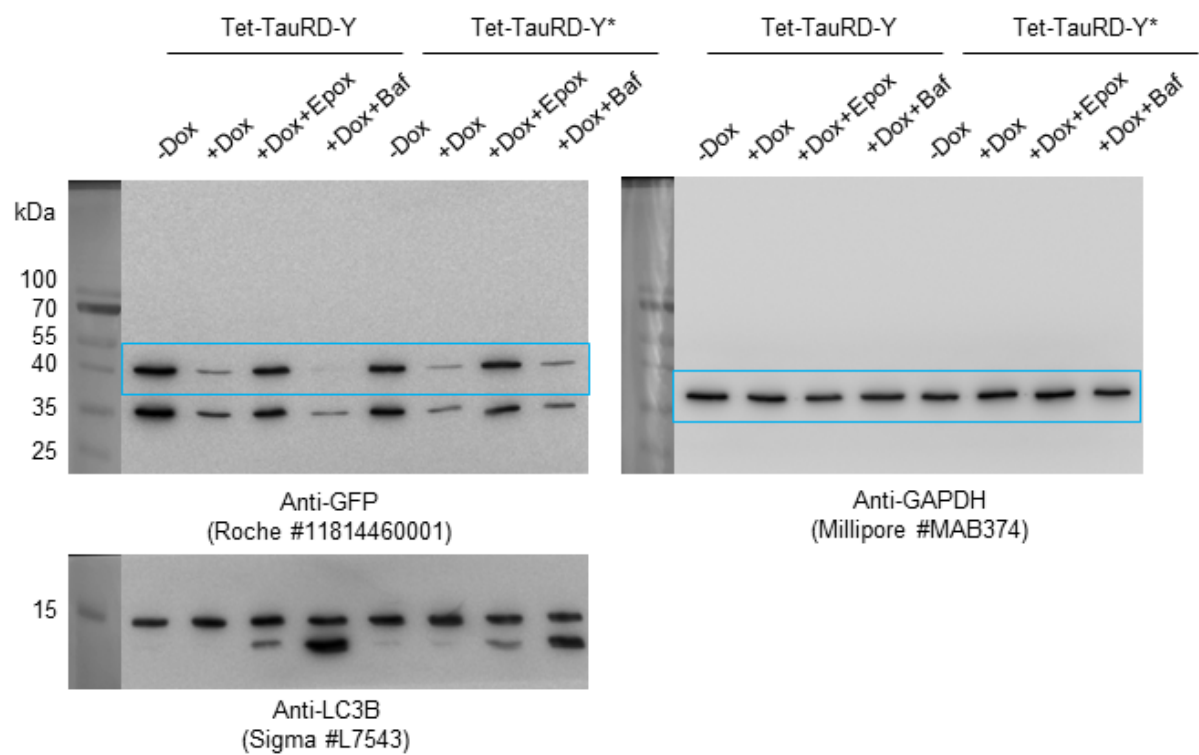

Supplementary Fig. 4b

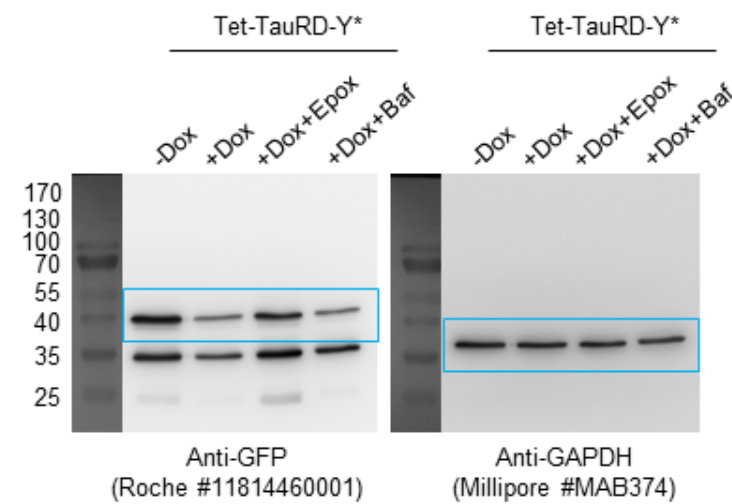

Supplementary Fig. 4e

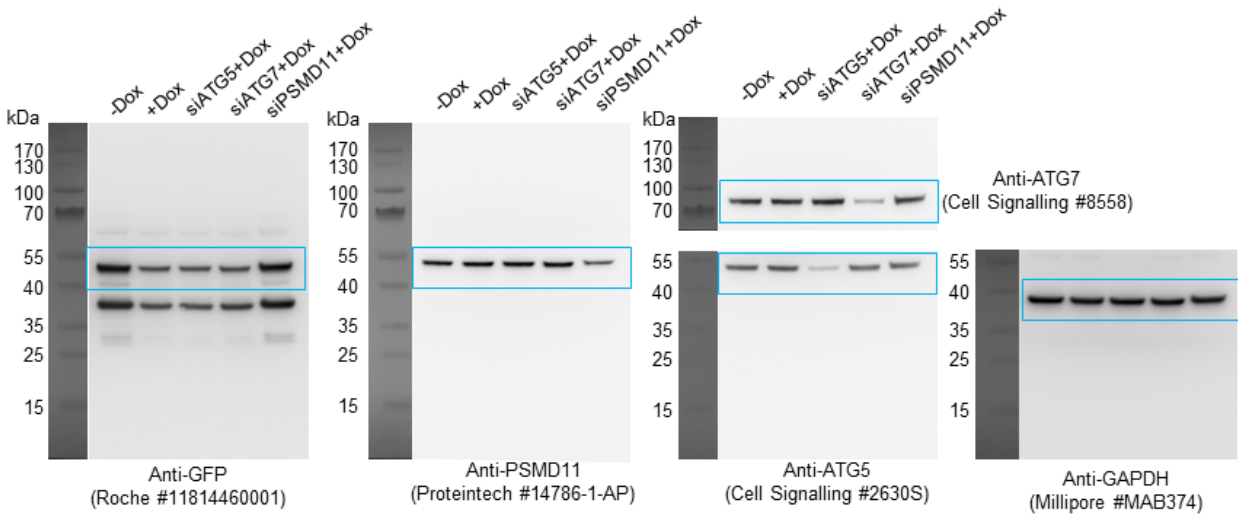

Supplementary Fig. 5e

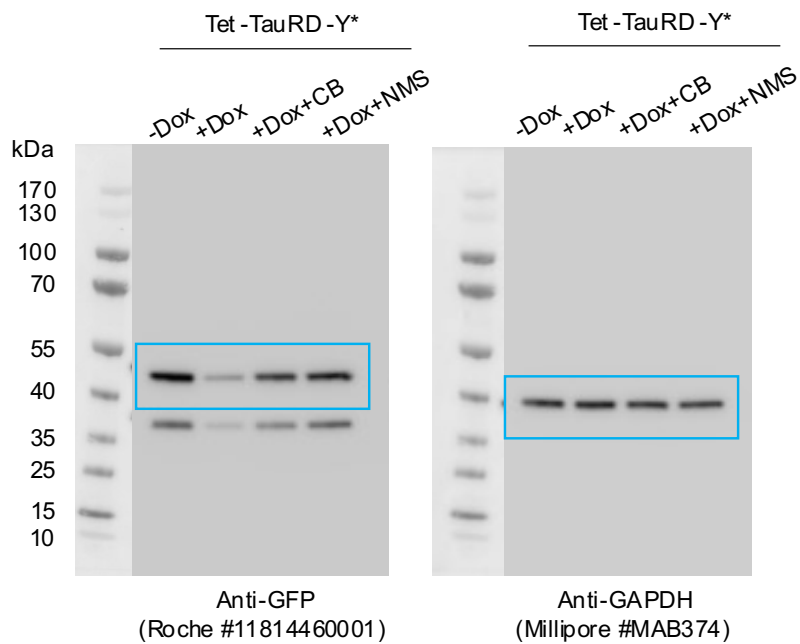

Supplementary Fig. 5g

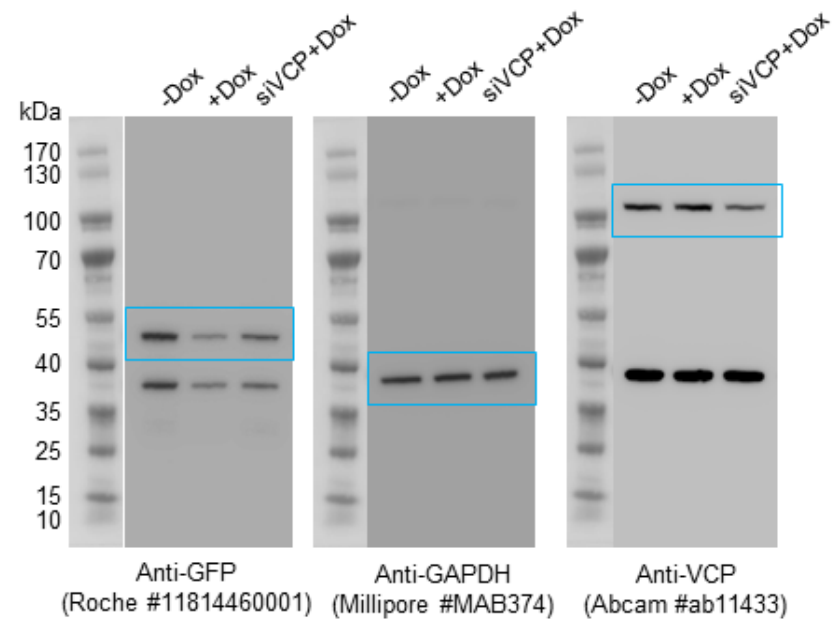

Supplementary Fig. 5i

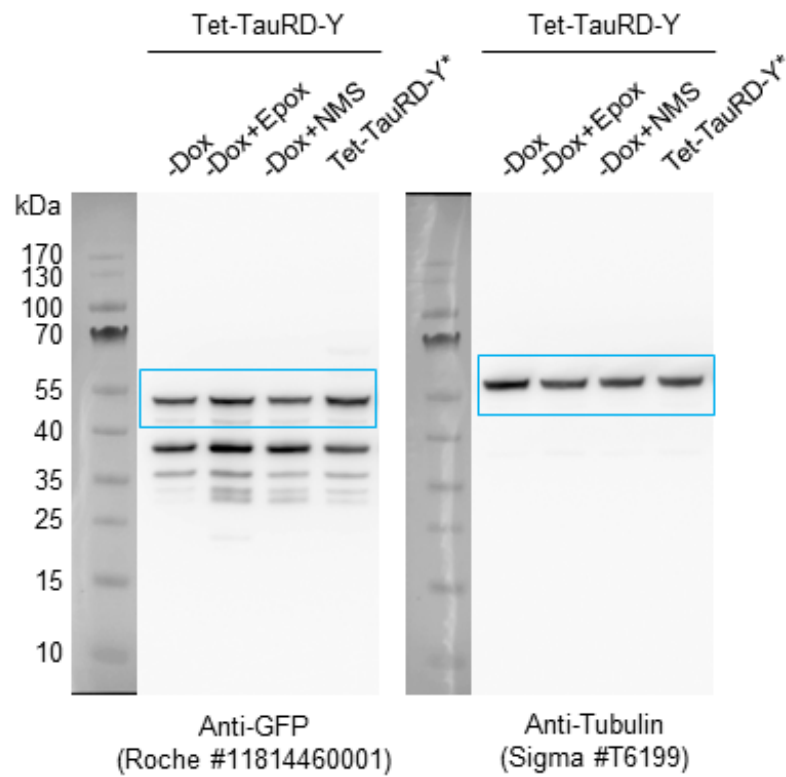

Supplementary Fig. 5k

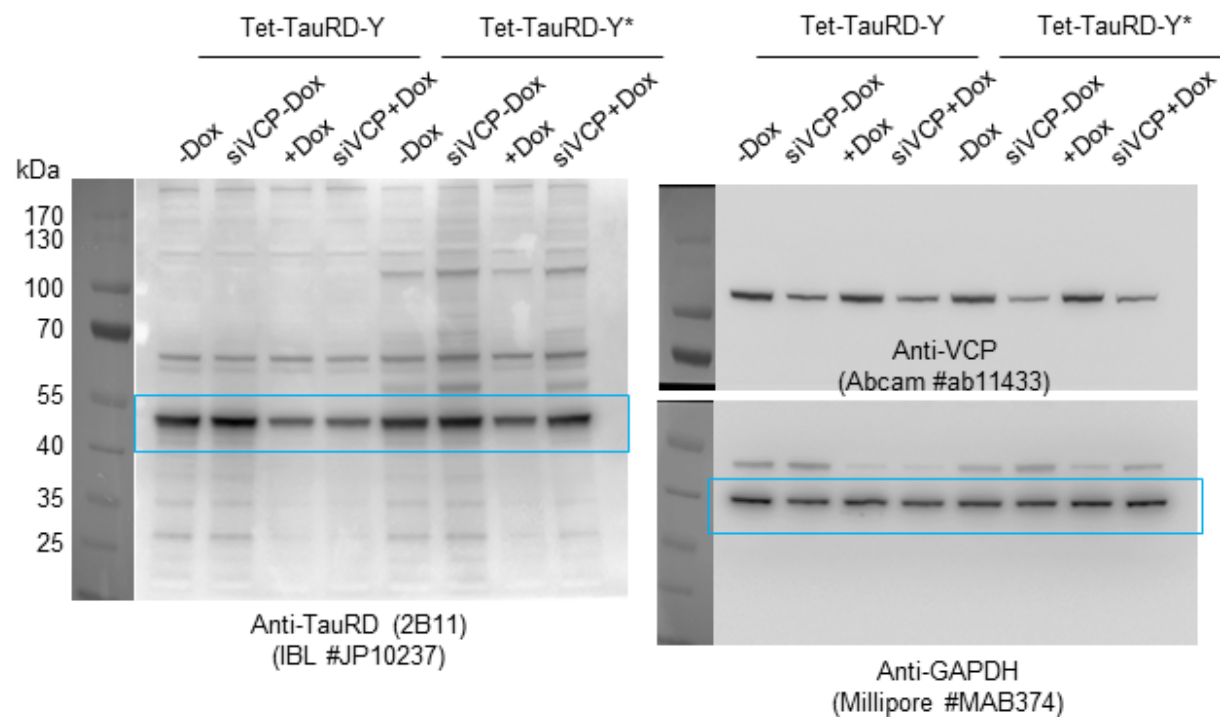

Supplementary Fig. 6c

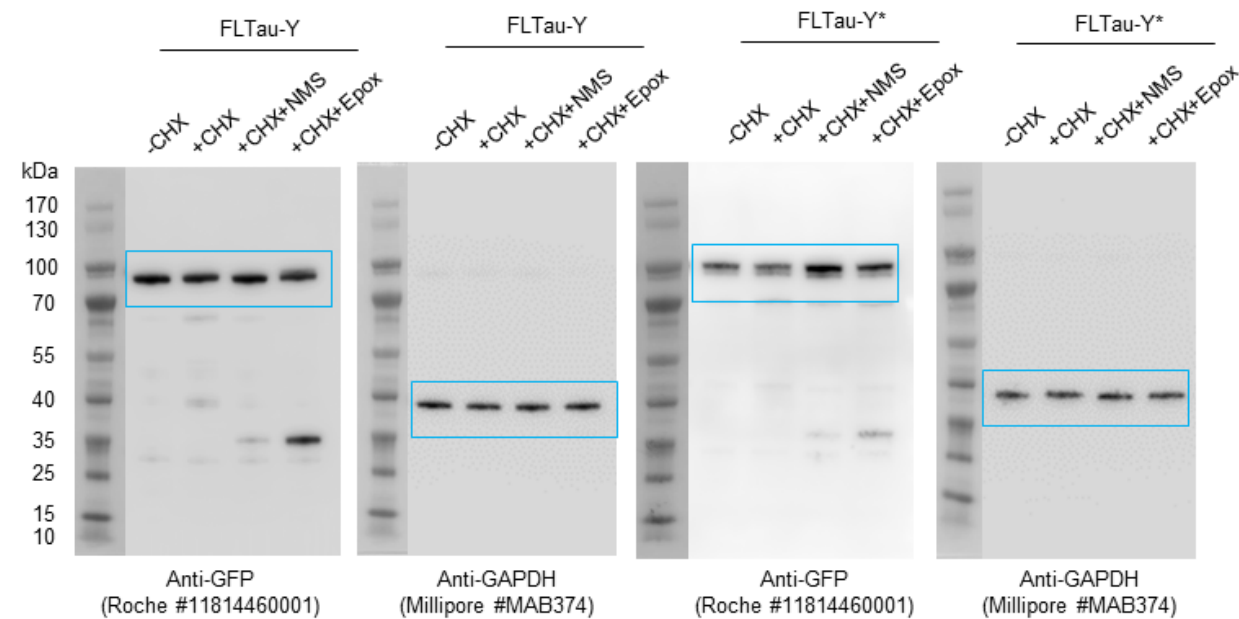



Supplementary Fig. 6e

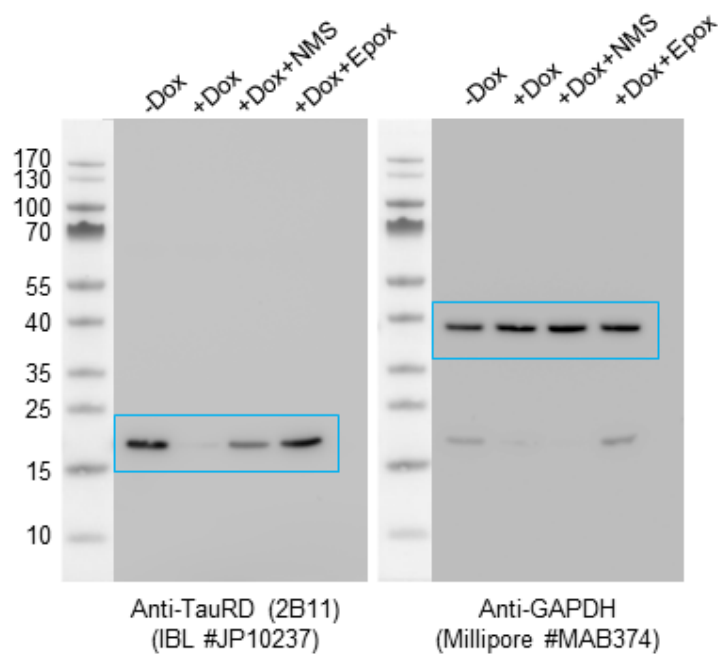

Supplementary Fig. 8e

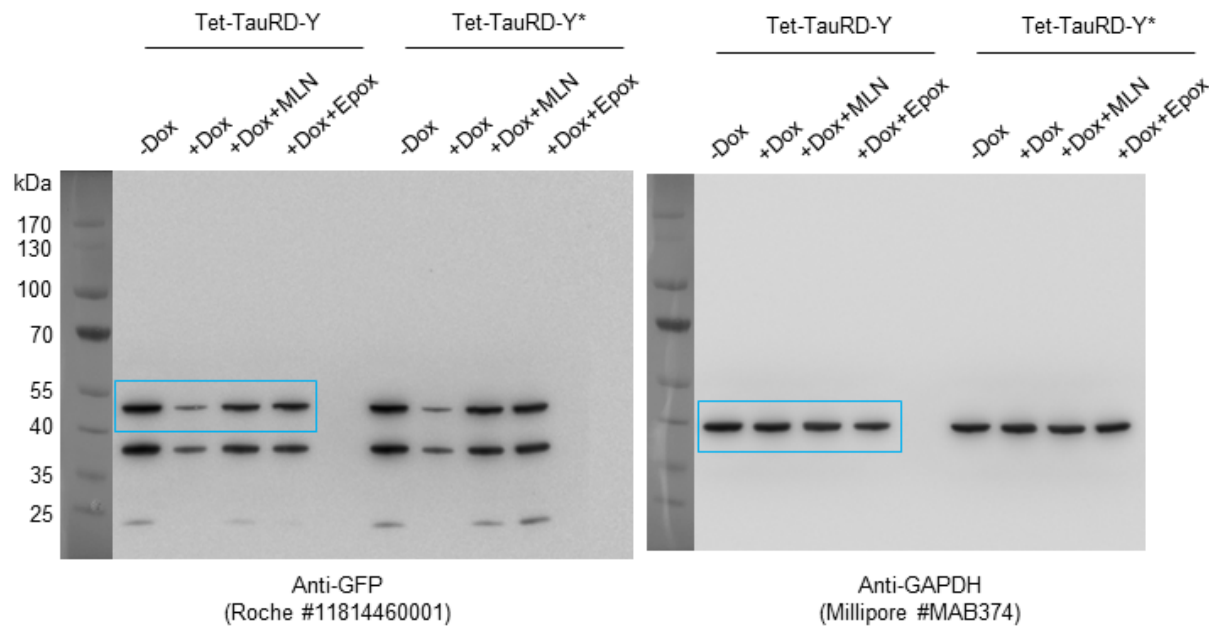

Supplementary Fig. 12c

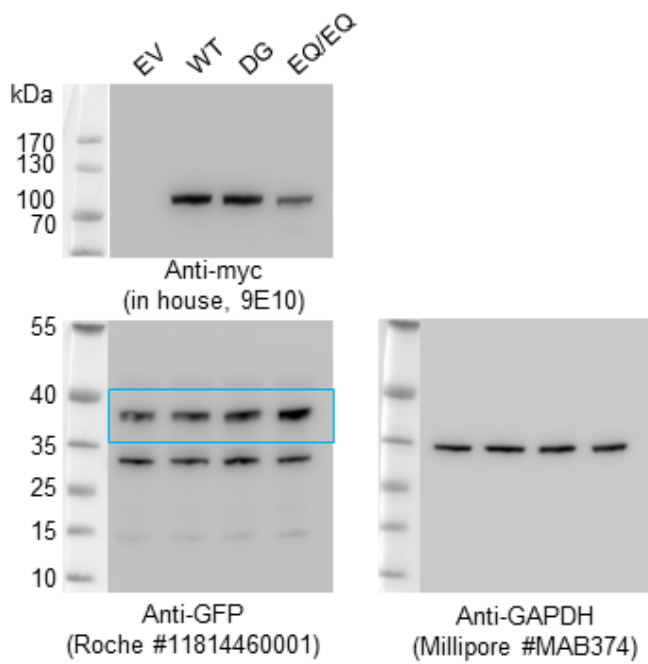

Supplement: MOESM1 [file 41467_2023_36058_MOESM1_ESM.pdf › 41467_2023_36058_MOESM1_ESM.pdf]
