# Supplementary material for: The AAA+ chaperone VCP disaggregates Tau fibrils and generates aggregate seeds in a cellular system
Source: Nat Commun. 2023 Feb 2;14:560. doi: 10.1038/s41467-023-36058-2 (PMC9894937; doi:10.1038/s41467-023-36058-2)
Supplement: Supplementary file 4 — Source Data [file 41467_2023_36058_MOESM4_ESM.xlsx]

## Sheet: Fig.1
Fig.1e
	Inclusions/cell							# Inclusions					# Cells
	Rep1	Rep2	Rep3	Mean	Stdev			Rep1	Rep2	Rep3			Rep1	Rep2	Rep3
-CHX	1.77293	1.55836	1.03425	1.45518	0.379998		-CHX	1179	988	604		-CHX	665	634	584
+CHX	0.55536	0.556757	0.249196	0.453771	0.177168		+CHX	316	309	155		+CHX	569	555	622
Fig.1f
	Inclusions/cell							# Inclusions					# Cells
	Rep1	Rep2	Rep3	Mean	Stdev			Rep1	Rep2	Rep3			Rep1	Rep2	Rep3
0 h	5.32677	5.40227	3.76722	4.83209	0.922973		0 h	1353	1907	1586		0 h	254	353	421
6 h	3.98641	4.2415	3.19097	3.80629	0.547935		6 h	1467	1247	919		6 h	368	294	288
12 h	1.80594	2.18801	1.60743	1.86712	0.295089		12 h	791	803	606		12 h	438	367	377
18 h	0.8119	1.08615	0.399351	0.765802	0.345714		18 h	423	353	123		18 h	521	325	308
24 h	0.263158	0.421927	0.169312	0.284799	0.12769		24 h	150	127	64		24 h	570	301	378
	Average inclusion size (µm2)
	Rep1	Rep2	Rep3	Mean	Stdev
0 h	1.392	1.44267	1.164	1.33289	0.14844
6 h	1.213	1.317	0.956	1.162	0.185825
12 h	0.929	0.802333	0.862667	0.864667	0.063357
18 h	0.749	0.741667	0.440333	0.643667	0.17613
24 h	0.591	0.829	0.545	0.655	0.152434

## Sheet: Fig.2
Fig.2c
Fig.2d
	Inclusions/cell								# Inclusions						# Cells
	Rep1	Rep2	Rep3	Rep4	Mean	Stdev			Rep1	Rep2	Rep3	Rep4			Rep1	Rep2	Rep3	Rep4
-Dox	3.47256	3.89883	6.48511	5.05914	4.72891	1.34916			2278	3006	3048	1882			656	771	470	372
+Dox	0.2768	0.500894	0.370741	0.235174	0.345902	0.117864			173	280	185	115			625	559	499	489
+Dox+NMS	3.07934	4.80945	3.82189	3.29126	3.75049	0.771976			1669	3256	2060	1356			542	677	539	412
+Dox+Epox	7.27717	8.9927	7.13014	6.80826	7.55207	0.980181			4017	4928	3123	2308			552	548	438	339
Fig.2f

## Sheet: Fig.3
Fig.3d
		Neuronal Viability (%)
		Rep1	Rep2	Rep3	Mean	Stdev
-TauRD-Y	-Seed	114.149	74.9522	110.899	100	21.7528
	+Seed	93.3078	73.805	107.648	91.587	16.9871
+TauRD-Y	-Seed	112.301	75.3346	100.382	96.0059	18.8677
	+Seed	71.1281	47.2913	63.4799	60.6331	12.1707
Fig.3e
		% Total area occupied by aggregates
		Rep1	Rep2	Rep3	Mean	Stdev
DMSO	-Seed	0	0	0.03	0.01	0.0173205
	+Seed	18.56	14.15	17.13	16.6133	2.24994
NMS	-Seed	2.58	0	0.34	0.973333	1.40176
	+Seed	33.93	36.4	26.12	32.15	5.36618

## Sheet: Fig.4
Fig.4a	Fig.4a
	Fig.4d
Fig.4d

## Sheet: Fig.5
Fig.5c
Fig.5d
	Inclusions/cell (fold change)										#Inclusions							#Cells							Inclusions/cell
	Rep1	Rep2	Rep3	Rep4	Rep5	Mean	Stdev				Rep1	Rep2	Rep3	Rep4	Rep5			Rep1	Rep2	Rep3	Rep4	Rep5			Rep1	Rep2	Rep3	Rep4	Rep5
-Dox	1	1	1	1	1	1	0			-Dox	1406	4286	2524	4560	1836		-Dox	804	767	400	550	334		-Dox	1.74876	5.58801	6.31	8.29091	5.49701
+Dox	0.361903	0.133096	0.138969	0.0731302	0.218383	0.185096	0.130439			+Dox	512	624	520	288	533		+Dox	809	839	593	475	444		+Dox	0.63288	0.743743	0.876897	0.606316	1.20045
+Dox+WT	0.387742	0.236815	0.106055	-	-	0.243537	0.140964			+Dox+WT	575	749	615	-	-		+Dox+WT	848	566	919	-	-		+Dox+WT	0.678066	1.32332	0.669206	-	-
+Dox+DG	0.314932	0.119303	0.266574	-	-	0.233603	0.101897			+Dox+DG	521	428	1164	-	-		+Dox+DG	946	642	692	-	-		+Dox+DG	0.55074	0.666667	1.68208	-	-
+Dox+AE	-	-	0.284592	0.114291	0.191086	0.196656	0.0852872			+Dox+AE	-	-	765	488	521		+Dox+AE	-	-	426	515	496		+Dox+AE	-	-	1.79577	0.947573	1.0504
+Dox+RH	-	-	0.117461	0.119674	0.316716	0.184617	0.114407			+Dox+RH	-	-	378	509	773		+Dox+RH	-	-	510	513	444		+Dox+RH	-	-	0.741176	0.992203	1.74099
+Dox+EQ	1.05559	0.69806	0.549847	-	-	0.767832	0.259989			+Dox+EQ	1510	2555	1936	-	-		+Dox+EQ	818	655	558	-	-		+Dox+EQ	1.84597	3.90076	3.46953	-	-

## Sheet: Fig.6
Fig.6b
	%FRET+ cells (Fold change)
	Rep1	Rep2	Rep3	Rep4	Rep5	Mean	Stdev
DMSO	1	1	1	1	1	1	0
NMS	0.31	0.38	0.21	0.45	-	0.3375	0.102429
VER	0.64	0.78	1.05	1	0.92	0.878	0.16769
Epox	0.72	1.06	-	0.74	0.91	0.8575	0.159661
MLN	0.53	0.42	0.39	-	-	0.446667	0.0737111
Fig.6c
	%FRET+ cells (Fold change)
	Rep1	Rep2	Rep3	Mean	Stdev
EV	1	1	1	1	0
WT	0.939665	0.926582	0.995745	0.953997	0.0367413
DG	0.992179	0.83038	1.1234	0.981988	0.146778
EQ/EQ	0.58324	0.392405	0.531915	0.50252	0.098755
Fig.6d
	HMW/LMW quantification
	Rep1	Rep2	Rep3	Mean	Stdev
DMSO	2.08671	2.82064	2.28001	2.39578	0.380416
NMS	0.657227	0.642002	0.755724	0.684984	0.0617337

## Sheet: Sup Fig.3
Fig.S3a
		TauRD-Y (% of start)
	Time (h)	Rep1	Rep2	Rep3	Mean	Stdev
	0	100	100	100	100	0
	3	46.0487	64.6553	62.3318	57.6786	10.1386
	6	31.3831	50.7368	38.3256	40.1485	9.80475
	12	17.2091	34.0922	20.629	23.9768	8.92554
	24	11.083	26.3154	15.9886	17.7957	7.77529
		TauRD-Y* (% of start)
	Time (h)	Rep1	Rep2	Rep3	Mean	Stdev
	0	100	100	100	100	0
	3	83.4089	67.5722	89.138	80.0397	11.1707
	6	73.9831	63.1294	83.1533	73.4219	10.0237
	12	65.8474	74.5242	54.3499	64.9072	10.1199
	24	43.9826	74.6101	46.6458	55.0795	16.9663
Fig.S3d								Rep-1										Rep-2									Rep-3
								gene		Ct 1	Ct 2	mean	Δ Ct	ΔΔ Ct	Fold change based on Δ Ct			gene		Ct 1	Ct 2	mean	Δ Ct	ΔΔ Ct	Fold change based on Δ Ct		gene		Ct 1	Ct 2	mean	Δ Ct	ΔΔ Ct	Fold change based on Δ Ct
								RPS18	TauRD-Y 0h	16.509	16.9375	16.7233	0					RPS18	TauRD-Y 0h	15.6972	15.4316	15.5644	0				RPS18	TauRD-Y 0h	15.9716	15.8752	15.9234	0
	Relative mRNA level (TauRD-Y)							RPS18	TauRD-Y 3h	16.4346	16.3313	16.3829	0.34034					RPS18	TauRD-Y 3h	15.9328	15.8059	15.8693	-0.304953				RPS18	TauRD-Y 3h	15.8208	15.8144	15.8176	0.105834
	Time (h)	Rep1	Rep2	Rep3	Mean	Stdev		RPS18	TauRD-Y 6h	16.3542	16.2589	16.3066	0.416677					RPS18	TauRD-Y 6h	15.7206	15.7304	15.7255	-0.161072				RPS18	TauRD-Y 6h	15.7806	15.7488	15.7647	0.158714
	0	1	1	1	1	0		RPS18	TauRD-Y 12h	16.0977	16.8406	16.4691	0.254154					RPS18	TauRD-Y 12h	15.6882	15.63	15.6591	-0.0947013				RPS18	TauRD-Y 12h	15.9365	15.7066	15.8215	0.10186
	3	0.115166	0.349724	0.300435	0.255109	0.123674		RPS18	TauRD-Y 18h	16.5043	16.5175	16.5109	0.212339					RPS18	TauRD-Y 18h	15.5204	15.5014	15.5109	0.0535035				RPS18	TauRD-Y 18h	15.9055	15.9368	15.9211	0.00228739
	6	0.0697488	0.101445	0.100457	0.0905503	0.0180213		RPS18	TauRD-Y 24h	16.3428	16.5253	16.4341	0.28921					RPS18	TauRD-Y 24h	15.7648	15.6951	15.7299	-0.165545				RPS18	TauRD-Y 24h	15.6404	15.552	15.5962	0.327204
	12	0.0401048	0.0538238	0.0671644	0.0536977	0.0135302		RPS18	TauRD-Y* 0h	16.6313	16.5669	16.5991	0					RPS18	TauRD-Y* 0h	15.46	15.2149	15.3375	0				RPS18	TauRD-Y* 0h	15.8364	15.8207	15.8285	0
	18	0.0389893	0.0417645	0.0756207	0.0521248	0.0203953		RPS18	TauRD-Y* 3h	16.0154	16.6512	16.3333	0.265794					RPS18	TauRD-Y* 3h	15.4951	15.5486	15.5218	-0.184353				RPS18	TauRD-Y* 3h	15.7918	15.6285	15.7102	0.118386
	24	0.0276562	0.0444843	0.0680564	0.0467323	0.0202937		RPS18	TauRD-Y* 6h	16.7113	16.6019	16.6566	-0.0574989					RPS18	TauRD-Y* 6h	15.6318	15.6417	15.6367	-0.299244				RPS18	TauRD-Y* 6h	15.8346	15.838	15.8363	-0.00778532
								RPS18	TauRD-Y* 12h	16.5271	16.6745	16.6008	-0.00176334					RPS18	TauRD-Y* 12h	15.5539	15.6136	15.5837	-0.246254				RPS18	TauRD-Y* 12h	15.1961	15.2161	15.2061	0.622418
	Relative mRNA level (TauRD-Y*)							RPS18	TauRD-Y* 18h	16.4846	16.3573	16.4209	0.178115					RPS18	TauRD-Y* 18h	15.3421	15.3548	15.3485	-0.010982				RPS18	TauRD-Y* 18h	15.6849	15.5946	15.6398	0.188793
	Time (h)	Rep1	Rep2	Rep3	Mean	Stdev		RPS18	TauRD-Y* 24h	16.7101	16.0614	16.3857	0.213351					RPS18	TauRD-Y* 24h	15.8149	15.5772	15.696	-0.358562				RPS18	TauRD-Y* 24h	15.6963	15.642	15.6691	0.159403
	0	1	1	1	1	0		Tau	TauRD-Y 0h	17.8577	18.1239	17.9908	0	0	1			Tau	TauRD-Y 0h	18.1513	18.1913	18.1713	0	0	1		Tau	TauRD-Y 0h	19.1887	19.3043	19.2465	0	0	1
	3	0.202288	0.457662	0.304417	0.321456	0.128537		Tau	TauRD-Y 3h	20.7713	20.7661	20.7687	-2.77787	-3.11821	0.115166			Tau	TauRD-Y 3h	19.9296	20.0543	19.992	-1.82066	-1.51571	0.349724		Tau	TauRD-Y 3h	20.8284	20.9226	20.8755	-1.62904	-1.73487	0.300435
	6	0.119726	0.176101	0.113113	0.136313	0.0346154		Tau	TauRD-Y 6h	21.4568	21.3748	21.4158	-3.42501	-3.84169	0.0697488			Tau	TauRD-Y 6h	21.7326	21.5346	21.6336	-3.4623	-3.30123	0.101445		Tau	TauRD-Y 6h	22.3978	22.4084	22.4031	-3.15664	-3.31535	0.100457
	12	0.0670151	0.0730004	0.0488575	0.0629577	0.0125725		Tau	TauRD-Y 12h	22.5179	22.2355	22.3767	-4.38593	-4.64008	0.0401048			Tau	TauRD-Y 12h	22.5355	22.4277	22.4816	-4.31031	-4.21561	0.0538238		Tau	TauRD-Y 12h	23.0137	23.0678	23.0408	-3.7943	-3.89616	0.0671644
	18	0.0435901	0.0459388	0.0662031	0.0519107	0.0124332		Tau	TauRD-Y 18h	22.2466	22.6718	22.4592	-4.46844	-4.68078	0.0389893			Tau	TauRD-Y 18h	22.8266	22.5721	22.6994	-4.52808	-4.58158	0.0417645		Tau	TauRD-Y 18h	22.9845	22.9541	22.9693	-3.72279	-3.72507	0.0756207
	24	0.0294376	0.0551971	0.0507002	0.0451116	0.0137591		Tau	TauRD-Y 24h	22.9959	22.7598	22.8778	-4.88704	-5.17626	0.0276562			Tau	TauRD-Y 24h	22.8576	22.7973	22.8274	-4.65611	-4.49056	0.0444843		Tau	TauRD-Y 24h	22.806	22.7868	22.7964	-3.54992	-3.87713	0.0680564
								Tau	TauRD-Y* 0h	18.2975	18.2444	18.2709	0	0	1			Tau	TauRD-Y* 0h	18.6602	18.6385	18.6493	0	0	1		Tau	TauRD-Y* 0h	19.1719	19.3322	19.252	0	0	1
								Tau	TauRD-Y* 3h	20.4454	20.1759	20.3107	-2.03972	-2.30552	0.202288			Tau	TauRD-Y* 3h	19.9867	19.9359	19.9613	-1.312	-1.12764	0.457662		Tau	TauRD-Y* 3h	20.7765	20.9226	20.8495	-1.59749	-1.71588	0.304417
								Tau	TauRD-Y* 6h		21.3906	21.3906	-3.11969	-3.06219	0.119726			Tau	TauRD-Y* 6h		21.4541	21.4541	-2.80477	-2.50553	0.176101		Tau	TauRD-Y* 6h	22.5012	22.3067	22.404	-3.15195	-3.14416	0.113113
								Tau	TauRD-Y* 12h	22.1746	22.1695	22.1721	-3.90113	-3.89937	0.0670151			Tau	TauRD-Y* 12h	22.6862	22.6568	22.6715	-4.02221	-3.77595	0.0730004		Tau	TauRD-Y* 12h	23.0082	22.9616	22.9849	-3.73286	-4.35528	0.0488575
								Tau	TauRD-Y* 18h	22.7123	22.513	22.6127	-4.34174	-4.51985	0.0435901			Tau	TauRD-Y* 18h	23.1134	23.0954	23.1044	-4.45512	-4.44414	0.0459388		Tau	TauRD-Y* 18h	22.9781	22.9823	22.9802	-3.72816	-3.91696	0.0662031
								Tau	TauRD-Y* 24h	22.7946	23.493	23.1438	-4.87284	-5.0862	0.0294376			Tau	TauRD-Y* 24h	23.1743	23.1999	23.1871	-4.53783	-4.17926	0.0551971		Tau	TauRD-Y* 24h	23.3447	23.4444	23.3945	-4.14246	-4.30187	0.0507002

## Sheet: Sup Fig.4
Fig.S4a
			TauRD-Y (% of control)
			Rep1	Rep2	Rep3	Rep4	Mean	Stdev
	Tet-TauRD-Y	-Dox	100	100	100	100	100	0
		+Dox	42.3135	34.6576	9.06781	22.3383	27.0943	14.5648
		+Dox+Epox	111.122	74.109	90.7804	63.9109	84.9806	20.649
		+Dox+Baf	65.1026	36.8075	2.70367	17.5733	30.5467	26.9373
	Tet-TauRD-Y*	-Dox	100	100	100	100	100	0
		+Dox	30.8272	65.277	6.14582	19.6075	30.4644	25.3069
		+Dox+Epox	97.8833	149.371	64.177	71.3875	95.7047	38.6011
		+Dox+Baf	50.2605	51.6665	11.0824	13.5663	31.6439	22.3387
Fig.S4c
		Inclusions/Cell								#Inclusions					#Cells
		Rep1	Rep2	Rep3	Mean	Stdev				Rep1	Rep2	Rep3			Rep1	Rep2	Rep3
	-Dox	4.36967	3.80392	4.62791	4.26717	0.421448			-Dox	922	388	796		-Dox	211	102	172
	+Dox	0.267176	0.120567	0.490683	0.292809	0.186385			+Dox	70	17	79		+Dox	262	141	161
	+Dox+Epox	5.9433	3.25882	5.0125	4.73821	1.3631			+Dox+Epox	1153	277	802		+Dox+Epox	194	85	160
	+Dox+3MA	0.6	0.216867	0.362791	0.393219	0.19337			+Dox+3MA	147	36	78		+Dox+3MA	245	166	215

## Sheet: Sup Fig.5
Fig.S5g
	Normalized TauRD-Y signal on filter trap
	Rep1	Rep2	Rep3	Mean	Stdev
siCtrl-Dox	1	1	1	1	0
siCtrl+Dox	0.268968	0.286634	0.499907	0.351836	0.128537
siVCP+Dox	0.665204	0.617215	0.66343	0.648616	0.0272089
Fig.S5h
	Average inclusion size (µm2)
	Rep1	Rep2	Rep3	Rep4	Rep5	Mean	Stdev
-NMS	4.32753	4.12745	4.25077	4.3329	4.9246	4.39265	0.308724
+NMS	6.9275	6.50415	6.63997	5.9974	5.98415	6.41063	0.412656
Fig.S5k
		TauRD-Y (% of control)
		Rep1	Rep2	Rep3	Rep4	Mean	Stdev
Tet-TauRD-Y	-Dox	100	100	100	100	100	0
	siVCP-Dox	110.362	109.171	115.466	123.908	114.727	6.70193
	+Dox	14.8015	30.688	20.4142	12.2958	19.5499	8.16445
	siVCP+Dox	17.4158	34.5375	31.2237	17.3795	25.1391	9.04088
		TauRD-Y (% of control)
		Rep1	Rep2	Rep3	Rep4	Mean	Stdev
Tet-TauRD-Y*	-Dox	100	100	100	100	100	0
	siVCP-Dox	165.992	153.837	178.578	150.742	162.287	12.6993
	+Dox	14.6427	50.1539	26.4033	16.0224	26.8056	16.4268
	siVCP+Dox	47.1703	128.736	88.0917	54.7351	79.6832	37.2217

## Sheet: Sup Fig.10
Fig.S10a
		Inclusions/cell [Fold change]									#Inclusions						Inclusions/cell
		Rep1	Rep2	Rep3	Mean	Stdev					Rep1	Rep2	Rep3				Rep1	Rep2	Rep3
> 1.5 µm	-Dox	1	1	1	1	0			> 1.5 µm	-Dox	65	87	111		> 1.5 µm	-Dox	0.677083	0.664122	0.840909
	+Dox	0.0753532	0.0813917	0.0337359	0.0634936	0.0259472				+Dox	5	6	4			+Dox	0.0510204	0.0540541	0.0283688
	+Dox+VER	0.63453	0.651134	0.285613	0.523759	0.206407				+Dox+VER	58	48	55			+Dox+VER	0.42963	0.432432	0.240175
	+Dox+NMS	1.15385	0.961501	0.638821	0.918056	0.260247				+Dox+NMS	75	53	65			+Dox+NMS	0.78125	0.638554	0.53719
											#Inclusions						#Inclusions/cell
		Rep1	Rep2	Rep3	Mean	Stdev					Rep1	Rep2	Rep3				Rep1	Rep2	Rep3
< 1.5 µm	-Dox	1	1	1	1	0			< 1.5 µm	-Dox	344	478	465		< 1.5 µm	-Dox	3.58333	3.64885	3.52273
	+Dox	0.142383	0.150609	0.217433	0.170141	0.0411618				+Dox	50	61	108			+Dox	0.510204	0.54955	0.765957
	+Dox+VER	1.44083	1.54559	1.47762	1.48801	0.0531503				+Dox+VER	697	626	1192			+Dox+VER	5.16296	5.63964	5.20524
	+Dox+NMS	0.860465	0.808968	1.14721	0.938882	0.182249				+Dox+NMS	296	245	489			+Dox+NMS	3.08333	2.95181	4.04132
											#Cells
											Rep1	Rep2	Rep3
										-Dox	96	131	132
										+Dox	98	111	141
										+Dox+VER	135	111	229
										+Dox+NMS	96	83	121

[truncated: 2 more sheets: Sup Fig.11, Sup Fig.12]
